# 1 **RAI1 Regulates Activity-Dependent Nascent Transcription and Synaptic Scaling**

2

3 Patricia M. Garay<sup>1</sup>, Alex Chen<sup>1</sup>, Takao Tsukahara<sup>2,3,4</sup>, Rafi Kohen<sup>1</sup>, J. Christian Althaus<sup>2,3</sup>,  
4 Margarete A. Wallner<sup>5</sup>, Roman J. Giger<sup>1,6-8</sup>, Michael A. Sutton<sup>1-3</sup> & Shigeki Iwase<sup>1,4</sup>

5

6 1. Neuroscience Graduate Program, The University of Michigan Medical School, Ann Arbor, MI  
7 48109, USA

8 2. Department of Molecular & Integrative Physiology, University of Michigan, Ann Arbor, Michigan  
9 48109, USA

10 3. Molecular and Behavioral Neuroscience Institute, University of Michigan, Ann Arbor, Michigan  
11 48109, USA

12 4. Department of Human Genetics, University of Michigan, Ann Arbor, Michigan 48109, USA

13 5. College of Literature, Science, & the Arts, University of Michigan, Ann Arbor, MI 48109, USA

14 6. Department of Cell and Developmental Biology, University of Michigan School of Medicine, Ann  
15 Arbor, MI, United States.

16  
17 7. Cellular and Molecular Biology Graduate Program, University of Michigan Medical School, Ann  
18 Arbor, MI, United States.

19  
20 8. Department of Neurology, University of Michigan Medical School, Ann Arbor, MI, United States.

21

22

23

24

25 \*Correspondence: [siwase@umich.edu](mailto:siwase@umich.edu) (S.I.), [masutton@umich.edu](mailto:masutton@umich.edu) (M.A.S)

26

27 **Abstract**

28 Long-lasting forms of synaptic plasticity such as synaptic scaling are critically dependent on  
29 transcription. Activity-dependent transcriptional dynamics in neurons, however, have not been  
30 fully characterized, because most previous efforts relied on measurement of steady-state  
31 mRNAs. Here, we profiled transcriptional dynamics of primary neuronal cultures undergoing  
32 network activity shifts using nascent RNA sequencing. We found pervasive transcriptional  
33 changes, in which ~45% of expressed genes respond to network activity shifts. Notably, the  
34 majority of these genes respond to increases or decreases of network activity uniquely, rather  
35 than reciprocally. We further linked the chromatin regulator Retinoic acid induced 1 (RAI1), the  
36 Smith-Magenis Syndrome gene, to the specific transcriptional program driven by reduced  
37 network activity. Finally, we show that RAI1 is essential for homeostatic synaptic upscaling but  
38 not downscaling. These results demonstrate the utility of *bona fide* transcription profiling to  
39 discover mechanisms of activity-dependent chromatin remodeling that underlie normal and  
40 pathological synaptic plasticity.

41

42

## 43 **Introduction**

44 Proper cognitive development and brain function relies on synaptic plasticity – the ability of  
45 synapses to strengthen or weaken in response to sensory or neuromodulatory inputs. Synaptic  
46 scaling is one mechanism of plasticity, which buffers potentially destabilizing patterns of network  
47 activity (Abbott and Nelson, 2000; Miller and MacKay, 1994; Turrigiano, 2008). In response to a  
48 sustained increase in neuronal firing rate, neurons decrease, or “scale-down”, the receptivity of  
49 the neuron to excitatory neurotransmitters. Conversely, global decreases in firing rate causes  
50 neurons to “scale-up” and increase synaptic efficacy. Synaptic scaling is thought to  
51 accommodate other forms of plasticity, such as long-term potentiation (LTP), that impose long-  
52 lasting increase of individual synaptic efficacy, which if left uncompensated, would result in  
53 circuits that are overly active (Turrigiano, 2017). Synaptic scaling appears to play important  
54 roles in neurodevelopment, learning, and memory (Fernandes and Carvalho, 2016; Yee et al.,  
55 2017). Dysregulated homeostatic plasticity is a common pathological hallmark in several  
56 neurodevelopmental disorders, including Fragile X (Soden and Chen, 2010), Rett syndrome  
57 (Zhong et al., 2012), tuberous sclerosis (Bateup et al., 2013), Kleefstra syndrome (Benevento et  
58 al., 2016), and has been proposed to underlie autism spectrum conditions (Bourgeron, 2015).  
59 To understand how homeostatic plasticity contributes to normal and pathological brain  
60 development, identifying the molecular mechanisms underlying synaptic scaling is an important  
61 first step.

62  
63 Long-lasting forms of synaptic plasticity, including synaptic scaling, require *de novo* synthesis of  
64 RNAs, which in turn produce the proteins that directly modulate synaptic efficacy (Benito and  
65 Barco, 2015; Ibata et al., 2008; Igaz et al., 2002). Increased neuronal firing leads to classic  
66 signal transduction cascades that eventually phosphorylate key transcription factors (TFs) such  
67 as cyclic AMP-response binding protein (West et al., 2002). TFs bind to specific DNA  
68 sequences, e.g. cyclic AMP-response element, and play essential roles in expression of  
69 immediate early genes (IEG), which encode key players in synaptic scaling, such as ARC  
70 (Bramham et al., 2008) and HOMER1 (Brakeman et al., 1997). Reduction of network activity  
71 leads to downregulation of these IEGs, while inducing the expression of genes that can scale up  
72 net synaptic efficacy (Schaukowitch et al., 2017). The gene expression programs triggered by  
73 reductions in network activity involves SRF, another key TF, which cooperates with the  
74 transcriptional coactivator ELK1 (Schaukowitch et al., 2017). However, molecular mechanisms  
75 underlying the transcriptional response to activity shifts remain incompletely understood.

76

77  
78 In order to control DNA accessibility of the transcription machinery, i.e. RNA polymerase II and  
79 associated factors, TFs need to collaborate with chromatin regulators. Chromatin regulators can  
80 deposit or remove a variety of modifications on DNA and histones, thereby influencing higher  
81 order chromatin structure. The strong linkage between cognitive disorders and chromatin-  
82 regulatory genes suggests that activity-dependent chromatin reorganization is essential for  
83 proper brain development and mental health (Ebert and Greenberg, 2013; Guzman-Karlsson et  
84 al., 2014; Mullins et al., 2016). The roles of many chromatin regulators have been described in  
85 activity-dependent gene expression that are linked to LTP and memory (Alarcón et al., 2004;  
86 Bourtchouladze et al., 2003; Guan et al., 2009; Gupta-Agarwal et al., 2012; Gupta-Agarwal et  
87 al., 2014; Iwase et al., 2016; Kerimoglu et al., 2013; Lim et al., 2017; Neelamegam et al., 2012;  
88 Oike et al., 1999; Oliveira, 2016; Rudenko et al., 2013; Vogel-Ciernia et al., 2013; Wang et al.,  
89 2015). However, only a handful of chromatin regulators, i.e., TET3 DNA demethylase (Yu et al.,  
90 2015), EHMT1/2 histone H3K9 methyltransferases (Benevento et al., 2016), and L3MBTL1  
91 methyl-histone binding factor (Mao et al., 2018) have been well-characterized for activity-  
92 dependent chromatin remodeling that underlies synaptic scaling. These three chromatin  
93 regulators participate distinctly in synaptic scaling. TET3 is essential for both up- and  
94 downscaling, whereas L3MBTL1 is essential only for synaptic downscaling.

95  
96 In order to dissect the mechanism by which chromatin regulators impart distinct effects on  
97 synaptic scaling, it is crucial to carefully monitor bidirectional transcriptional responses to  
98 increases or decreases in network activity. Most studies have addressed this issue using  
99 quantification of steady-state mRNA levels, using RT-qPCR, cDNA microarray, and mRNA-seq.  
100 The brain is characterized by its notorious complexity of post-transcriptional regulation, including  
101 activity-dependent mRNA splicing (Hermey et al., 2017), mRNAs stability (Widagdo and  
102 Anggono, 2018), mRNA transport and local translation (Glock et al., 2017). Therefore, changes  
103 in steady-state mRNA levels do not necessarily indicate a direct transcriptional impact of a given  
104 chromatin regulator. Thus, reliance on steady-state mRNA measurements may obscure the  
105 roles of chromatin regulators in transcription.

106  
107 In the present work, we developed genome-wide measurement of *bona fide* transcriptional  
108 dynamics in response to bidirectional network activity alterations. We then used this approach to  
109 uncover a novel role for the chromatin regulator Retinoic acid induced 1 (RAI1) in the  
110 transcriptional program specifically elicited by reduced neural activity. RAI1 is a nucleosome

111 binding protein (Darvekar et al., 2012; Darvekar et al., 2013) that is consistently expressed in  
112 the brain during neurogenesis and throughout adulthood, in both mice and humans (Huang et  
113 al., 2016). *RAI1* is associated with two human intellectual disability syndromes. *RAI1*  
114 haploinsufficiency leads to Smith-Magenis Syndrome (SMS, MIM: 182290), while duplication of  
115 the genomic region containing *RAI1* results in Potocki-Lupski syndrome (PTLS, MIM: 610883)  
116 (Bi et al., 2004; Girirajan et al., 2005; Potocki et al., 2007; Slager et al., 2003), Heterozygous  
117 and homozygous *Rai1*-knockout (KO) mice exhibit many of the symptoms of SMS patients  
118 including learning deficits, abnormal circadian and social behavior, as well as obesity (Bi et al.,  
119 2005; Bi et al., 2007; Laccaria et al., 2013) (Huang et al., 2018; Huang et al., 2016). Furthermore,  
120 heterozygous *Rai1*-KO mice display altered gene expression profiles and reduced dendritic  
121 spine density in the prefrontal cortex. These studies implicate a role for RAI1 in gene  
122 expression, neuronal structure, and behavior, but the precise role for RAI1 in activity-dependent  
123 transcription and synaptic plasticity remains unclear. Here, using nascent RNA sequencing to  
124 monitor *bona fide* transcriptional events during network activity shifts, we define a specific role  
125 for RAI1 in the transcription program elicited by reduced network activity and show further that  
126 RAI1 is essential for homeostatic upscaling during chronic activity suppression.

127

128

## 129 **Results**

### 130 **Altered neuronal network-activity triggers genome-wide transcriptional changes**

131 We first sought to develop an experimental paradigm that allows us to monitor *bona fide*  
132 transcriptional dynamics in neuronal networks. To overcome the major limitation of conventional  
133 RNA-seq. i.e. profiling only steady-state RNA quantities, we adopted Bromouridine-sequencing  
134 (Bru-seq), a genome-wide profiling technique of nascent transcripts (Paulsen et al., 2014;  
135 Paulsen et al., 2013). We prepared primary forebrain neuronal cultures from E18 mouse  
136 embryos, and allowed them to mature for 17 days *in vitro* (DIV). To monitor bidirectional  
137 transcriptional responses to activity shifts, network activity was either elevated by 20  $\mu$ m  
138 bicuculline (BIC, a GABA<sub>A</sub>-receptor antagonist) or suppressed by 1  $\mu$ m tetrodotoxin (TTX, a  
139 sodium channel blocker) for 4 hours. During the last 20 minutes of BIC or TTX treatment,  
140 bromouridine (BrU) was added to the culture medium to label newly-synthesized transcripts.  
141 The labeled RNAs were isolated by immunoprecipitation using an anti-BrU antibody and  
142 subjected to next-generation sequencing (Fig. 1A).

143  
144 We first validated the results of Bru-seq by examining transcription of known activity-dependent  
145 genes individually. As shown in Figure 1B, we found the expected changes of *Arc* and *Fos*,  
146 which were downregulated by TTX and upregulated by BIC. Abundant intronic reads indicate  
147 that detected transcripts were recently generated and yet to be spliced. Other well-characterized  
148 activity-dependent genes such as *Npas4*, *Egr1*, *Homer1*, *Tet3*, and *Txnip* showed expected  
149 transcriptional dynamics (Table S1). Thus, Bru-seq reliably captures known transcriptional  
150 responses to bidirectional shifts in network activity.

151  
152 Following individual gene validation, we characterized genome-wide transcriptional responses  
153 to BIC and TTX. Differential gene expression analysis of the Bru-seq data using DESeq2 (Love  
154 et al., 2014) revealed widespread transcriptional changes, in which 45% of expressed genes  
155 (7,592/16,682) were significantly up- or down-regulated by network activity shifts ( $p_{adj} < 0.05$ ,  
156 Fig.1C). BIC increased transcription of 2,908 genes, whereas TTX did so for 1,820 genes. The  
157 magnitude of transcriptional induction is higher in BIC treatment compared to TTX (Fig. 1D).  
158 Meanwhile, a similar number of genes were transcriptionally suppressed upon BIC (2,842) and  
159 TTX (2,307) treatments. A relatively small fraction of genes, 24% (1,798 of 7,592 activity-  
160 response genes), displayed reciprocal changes between BIC and TTX treatments, e.g.  
161 upregulation by BIC and downregulation by TTX (Fig.1E). An even smaller fraction, 6%  
162 (487/7,592) of activity-response genes altered their transcription levels in the same direction

163 after BIC and TTX treatments. The remaining 70% of genes (5,307/7,592) responded to BIC or  
164 TTX uniquely. Supplemental Table 1 lists genes that displayed greater than 2-fold changes in  
165 transcription upon network-activity shifts.

166  
167 We next analyzed two published mRNA-seq datasets, which profiled the steady-state  
168 transcriptome of mouse cortical neurons treated with TTX or BIC for 4 or 6 hours (Schaukowitch  
169 et al., 2017; Yu et al., 2015) with identical processing and analyses (see methods). We found  
170 that Bru-seq identified a greater number of differentially-expressed (DE) genes compared to  
171 conventional mRNA-seq. The DE genes found in each dataset only partially overlapped  
172 (Fig.S1A). However, the groups of DE genes identified in the mRNA-seq dataset of 4-hour  
173 treatments were shifted in the same direction in Bru-seq (Fig. S1B). In contrast, the group of DE  
174 genes of the 6-hour RNA-seq dataset did not show any noticeable transcriptional changes in the  
175 Bru-seq data (Fig. S1C). These results suggest that transcriptional responses are highly  
176 dynamic and correlate with steady-state mRNA levels only in a narrow window of time (< 2 hr).

177 Conventional mRNA-seq may not be the ideal approach to detect downregulation of  
178 transcription, because after transcription ceases, synthesized RNAs persist for certain periods  
179 of time. To test whether Bru-seq can detect transcriptional downregulation sensitively, we  
180 compared the induction and suppression of known immediate-early genes in our Bru-seq and  
181 published mRNA-seq datasets. We found significantly larger suppression of *Fos*, *Arc*, *Bdnf*, and  
182 *Npas4* (4- to 16-fold) by TTX treatment in Bru-seq compared to conventional mRNA-seq, in  
183 which downregulation was less than 2-fold (Fig. 1F). In the Bru-seq data, the four genes showed  
184 smaller magnitudes of upregulation in response to BIC, likely because the early transcriptional  
185 induction is largely complete 4 hours after BIC treatment (Fig. S1C). These data highlight an  
186 advantage of the Bru-seq approach to probe mechanisms underlying highly-dynamic activity-  
187 dependent transcription.

188 We next examined the cell-type specificity of activity-dependent genes in our datasets. Recent  
189 studies have reported that different cell types such as astrocytes and neuronal subtypes induce  
190 distinct sets of genes in an activity-dependent manner (Hasel et al., 2017; Hrvatin et al., 2018).  
191 Using immunocytochemistry of a set of well-established markers, NeuN, GAD67, GFAP,  
192 CD11b, and Olig2, we estimated that our cultures consist of 41% excitatory neurons, 11%  
193 inhibitory neurons, 33% astrocytes, 15% of cells within the oligodendrocyte lineage, and no  
194 microglia (Fig. S2A-B). Indeed, several non-neuronal genes are represented in our dataset,  
195 including *Thbs1*, a known synaptic regulator specifically expressed in astrocytes (Risher and

196 Eroglu, 2012). Gene ontology analysis of the Bru-seq data detected enrichment of biological  
197 processes specific for both neurons and non-neuronal cell types (Table S2). For example,  
198 regulation of axon diameter ( $p_{\text{adj}} = 2.6 \times 10^{-5}$ ), axonal transport of mitochondrion ( $p_{\text{adj}} = 3.5 \times$   
199  $10^{-4}$ ), and glial cell proliferation ( $p_{\text{adj}}: 7.8 \times 10^{-3}$ ) represent genes that are transcriptionally  
200 induced upon BIC treatment, while transcription of genes involved in astrocyte activation are  
201 down-regulated by BIC ( $p_{\text{adj}}: 9.8 \times 10^{-5}$ ). TTX treatment leads to increased transcription of myelin  
202 maintenance genes ( $p_{\text{adj}}: 7.4 \times 10^{-3}$ ). Reciprocally enriched biological processes include  
203 interneuron migration (BIC Down,  $p_{\text{adj}}: 1.7 \times 10^{-3}$ , TTX Up,  $p_{\text{adj}}: 7.0 \times 10^{-2}$ ) and neuropeptide  
204 signaling pathway (BIC Up,  $p_{\text{adj}}: 8.5 \times 10^{-7}$ , TTX down,  $p_{\text{adj}}: 4.7 \times 10^{-5}$ ). When we intersected  
205 published cell type-enriched genes (Zhang et al., 2014) (see Methods) with the Bru-seq data,  
206 indeed, some neuronal- and non-neuronal genes transcriptionally respond to activity shifts (Fig.  
207 S2C).

208

### 209 **RAI1 suppresses the TTX-induced transcriptional program in resting network**

210 The superior sensitivity of Bru-seq over conventional RNA-seq prompted us to assess the role  
211 of RAI1 in activity-dependent gene expression. We first determined RAI1 expression in our  
212 culture systems. Publically-available databases indicate ubiquitous *Rai1* expression in a broad  
213 array of cell types in the brain (Fig. S3). Previous studies have demonstrated that *Rai1* mRNA  
214 expression rises from E13.5 to peak at P7, and its expression continues throughout adulthood  
215 across brain regions (Fragoso et al., 2014; Huang et al., 2016). We developed an anti-RAI1  
216 antibody and confirmed that RAI1 protein was expressed in virtually all MAP2-positive neurons  
217 and primarily localized to the nucleus with subtle but detectable extra-nuclear signals in the  
218 soma (Fig. S4A). We found relatively low RAI1 levels in non-neuronal (MAP2-negative) cell  
219 nuclei (Fig. S4A). To examine if RAI1 protein levels or nuclear localization is altered by activity,  
220 we probed for RAI1 in cortical neurons treated with BIC, TTX, or Vehicle for 15 min, 1 hr, 2 hr, 4  
221 hr, 8 hr, or 24 hr, using Western blots and fluorescent microscopy. Neither RAI1 protein levels  
222 nor localization were visibly altered in response to drug treatment at any time-point (Fig. S4 and  
223 S5). RAI1 has been shown to occupy a large fraction of active promoters in the mouse adult  
224 cortex (Huang et al., 2016). To examine whether RAI1 preferentially occupies activity-response  
225 genes, we utilized the published RAI1 chromatin immunoprecipitation sequencing (ChIP-seq)  
226 data obtained from the cortices of 8-week old mice (Huang et al., 2016). RAI1 ChIP-seq peaks  
227 were found at promoters of ~80% genes that are expressed at detectable levels, regardless of  
228 their activity-dependent transcriptional changes (Fig. S6A). We did not find any statistically-



229 significant enrichment or depletion of RAI1 occupancy of TTX- or BIC-response genes (Fig.  
230 S6A). Thus, these data indicate that neuronal activity does not influence RAI1's expression level  
231 or subcellular localization and that steady-state chromatin occupancy by RAI1 is not selective  
232 between BIC or TTX-response genes.

233 To directly test RAI1's role in activity-dependent transcription, we went on to perform *Rai1*  
234 knockdown (KD) in the primary cultures using lentiviral vectors (LV) carrying *Rai1*- or scramble  
235 shRNAs (sh-Ctrl). To minimize impact of RAI1 loss on network connectivity, we delivered LV  
236 shRNA at DIV14, a time by which functional synapses have formed. Near complete loss of RAI1  
237 protein was achieved by 3 days post-LV infection (Fig. 2A). Next, we modulated network activity  
238 of LV-treated cultures by applying TTX or BIC for four hours. Genome-wide transcription events  
239 were assessed by Bru-seq as described above.

240 We initially sought to establish if *Rai1*-KD alone was sufficient to alter nascent transcription in  
241 resting neuronal cultures. DESeq2 analysis revealed that 104 genes were downregulated and  
242 18 genes were upregulated by *Rai1*-KD in the Vehicle-treated condition ( $p_{\text{adj}} < 0.05$ , Fig. 2B,  
243 Table S3). The greater number of downregulated genes is consistent with previous studies  
244 demonstrating that RAI1 functions predominately as a transcriptional activator (Burns et al.,  
245 2010; Carmona-Mora et al., 2012; Carmona-Mora et al., 2010; Elsea and Williams, 2011;  
246 Girirajan et al., 2009; Huang et al., 2016). A majority of genes altered by *Rai1*-KD at baseline  
247 were either BIC- or TTX-response genes (Fig. 2C). Of note, however, BIC- or TTX-response  
248 genes were not significantly enriched in RAI1-dependent genes when gene groups were  
249 corrected for their expression levels (data not shown).

250 To further characterize the relationship between RAI1 deficiency and BIC- or TTX-response  
251 genes, we examined how individual genes behave upon *Rai1*-KD. We found a clear positive  
252 correlation between the normal transcriptional response to TTX and the transcriptional  
253 impairment by *Rai1*-KD at baseline ( $r=0.53$ ,  $p=2.2 \times 10^{-16}$ , Spearman rank correlation coefficient,  
254 t-test, Fig. 2D, left panel). No correlation was found in BIC-response genes and *Rai1*-KD (Fig.  
255 2D, right panel). The group of genes that respond reciprocally to TTX and BIC (Fig. 1E) showed  
256 similar correlation with all TTX-responsive genes (Fig. S6B). When we removed all DE genes  
257 upon *Rai1*-KD from the plot, the correlation remained significant ( $r=0.52$ ,  $p=2.2 \times 10^{-16}$ , Fig. S6C),  
258 suggesting that the correlation was not solely driven by the DE genes. We also analyzed the  
259 published mRNA-seq of the *Rai1*-KO cortices (Huang et al., 2016) and found a similar trend in  
260 expression pattern of the TTX- and BIC-response genes (Fig. S6D). These data indicate that  
261 RAI1 deficiency shifts the transcriptional profile towards the TTX-treated state without drug

262 application and that *Rai1*-KD does not impact transcription of non-reciprocal BIC-responsive  
263 genes.

264

### 265 **RAI1 deficiency promotes synaptic upscaling**

266 Chronic perturbation of neuronal activity by BIC or TTX is known to induce decreases and  
267 increases in synaptic strength, which respectively, underlie homeostatic synaptic downscaling  
268 and upscaling (Abbott and Nelson, 2000; Miller and MacKay, 1994; Turrigiano, 2008). Given  
269 that *Rai1*-KD shifted the nascent transcriptome towards the TTX-like state, we next asked  
270 whether *Rai1*-KD would similarly shift excitatory synapse function towards a state similar to  
271 synaptic upscaling. We used sparse transfection of DIV12-14 hippocampal cultures with either  
272 *Rai1*- or scrambled shRNA, and recorded miniature excitatory postsynaptic currents (mEPSCs)  
273 from transfected pyramidal-like neurons 48 hours later. If *Rai1*-KD induces synaptic  
274 strengthening in a cell-autonomous manner, we would expect to see a rightward shift in the  
275 distribution of mEPSC amplitudes as is observed during synaptic upscaling following chronic  
276 activity suppression with TTX. Consistent with this idea, we found that expression of two distinct  
277 shRNAs targeting *Rai1* mRNA each induced a significant increase in baseline mEPSC  
278 amplitude (sh-Ctrl vs. sh-*Rai1* #1: n = 21-21, p=0.019, sh-Ctrl vs. sh-*Rai1* #2: n = 18-19, p =  
279 0.0011), without significantly altering mEPSC frequency or decay time (Fig 3A-D). Moreover,  
280 *Rai1*-KD induced a clear rightward shift in the cumulative probability distribution of mEPSC  
281 amplitudes in a manner that bears a striking similarity to changes in mEPSC distributions  
282 following chronic TTX treatment (Fig. 3E). An increase in surface expression of AMPA receptors  
283 (AMPA receptors) at synapses is a signature of synaptic upscaling following activity suppression.  
284 Consistent with previous observations, surface expression of the GluA1 AMPAR subunit at  
285 PSD-95-labeled excitatory synapses is significantly increased following chronic (24 hr) TTX  
286 treatment (sh-Ctrl Vehicle vs. TTX: n = 13-12, p = 0.0019, Fig. 3F). Likewise, we found a similar  
287 enhancement of surface GluA1 at synapses following 48 hr *Rai1*-KD (sh-Ctrl vs. sh-*Rai1*: n = 6-  
288 6 p = 0.0065, Fig 3F). Together, these results suggest that reduced *Rai1* expression induces  
289 functional changes in excitatory synaptic function that mimic synaptic upscaling induced by  
290 activity suppression.

291

### 292 **RAI1 promotes the transcriptional response to reduction in network activity**

293 Having uncovered that RAI1 is essential to suppress the TTX-associated transcriptional  
294 program under baseline activity conditions (Fig. 2), we next tested if *Rai1*-KD has any impact on  
295 transcriptional induction and suppression upon TTX and BIC treatments. By calculating fold-  
296 changes of transcription, we found that *Rai1*-KD led to a significant impairment of transcriptional  
297 response to TTX, while transcriptional response to BIC was slightly weakened only for  
298 downregulation (Fig. 4A). However, in contrast to the 130 genes transcriptionally altered at  
299 baseline, DESeq2 gave only 8 genes as DE genes by *Rai1*-KD post TTX or BIC treatment,  
300 indicating that the impact of *Rai1*-KD is larger in resting neurons compared to drug-treated  
301 neurons (Fig. 4A, Table S3).

302 We then sought to determine if the strongly-impaired transcriptional response to TTX (Fig. 4A)  
303 was due entirely to the TTX-like transcriptional state of *Rai1*-KD culture at baseline or if RAI1  
304 also contributes to the transcriptional response to TTX. Differential gene expression analysis by  
305 DESeq2 relies on an arbitrary statistical significance cutoff to report differentially expressed  
306 genes. However, the individual gene plot in the baseline condition revealed a global  
307 transcriptional trend resulting from small changes in many genes including those that failed to  
308 achieve statistical significance (Fig. 2E and S6B). To define the impact of RAI1 loss after TTX-  
309 and BIC-treatment, we therefore employed this individual-gene plot approach. We found that,  
310 after TTX treatment, the transcriptional changes of TTX-response genes in *Rai1*-KD cultures  
311 inversely correlate with their changes upon TTX treatment in the control condition (Fig. 4C,  
312  $r=0.32$ ,  $p=2.2 \times 10^{-16}$ , Spearman rank correlation coefficient, t-test). No correlation of TTX-  
313 response genes was observed after BIC treatment, suggesting RAI1 regulates TTX-associated  
314 transcription in baseline and TTX-treated conditions, but not under neural hyperactivation (Fig.  
315 S7A). Additionally, transcription of the BIC-response genes did not correlate with the  
316 transcription of genes in *Rai1*-KD cultures under any condition (Fig. 4A). Thus, *Rai1*-deficiency  
317 leads to subtle yet widespread impairment of the transcriptional response to TTX but not to BIC.  
318 Taken together, the Bru-seq results led us to conclude that 1) RAI1-deficiency shifts  
319 transcriptional profiles towards an activity-suppressed state in the resting network (Fig. 2), and  
320 2) RAI1 is selectively required for the transcriptional response driven by network activity  
321 suppression (Fig. 3).

322 We sought to explore biological implications for such small but pervasive deficits in  
323 transcriptional response to TTX. We utilized RNA-Enrich, a gene ontology algorithm, in which  
324 the entire output of DESeq2 is analyzed, such that the program takes into account statistically-  
325 weaker changes in gene expression (Kim et al., 2012; Lee et al., 2016). Surprisingly, although

326 *Rai1*-KD resulted in the greatest number of DE-genes in the vehicle-treated condition, RNA-  
327 Enrich identified many more RAI1-dependent biological processes after TTX treatment than  
328 vehicle- or BIC treatments (45 in TTX-, 3 in vehicle-, and 7 in BIC-treated cultures, Fig. 4B). The  
329  $p_{adj}$  values were evidently lower in the post-TTX transcriptome data compared to BIC conditions  
330 (Fig. 4D). Furthermore, the RAI1-dependent gene ontologies after TTX treatment represent  
331 synapse-related processes, whereas those altered in the BIC and Vehicle-treated conditions  
332 show fewer ontologies directly relevant to neuronal activity (Fig. 4B and Table S4). The RNA-  
333 enrich provides the identity of signature genes, called Sig-genes, which significantly contributed  
334 to the enrichment of a given ontology (Kim et al., 2012; Lee et al., 2016). As expected, the  
335 genes that contributed to the enrichment of the synapse-related ontologies (e.g. *Ngf*, *Syn3*,  
336 *Cacna1b*, *Rab3a*) showed mild transcriptional changes upon *Rai1*-KD, yet the changes are  
337 consistent across biological replicates (Fig. 4E and Fig. S7B).

338

### 339 **Loss of RAI1 prevents synaptic upscaling but not downscaling**

340 We next examined RAI1's role in homeostatic synaptic scaling induced by chronic activity  
341 suppression (TTX, 24 hr) or chronic network hyperactivation (BIC, 24 hr). Consistent with the  
342 misregulation of TTX-responsive genes by *Rai1*-KD after TTX treatment (Fig. 4), we found that  
343 loss of RAI1 significantly impaired the induction of homeostatic upscaling during activity  
344 suppression in a cell-autonomous manner. Following transfection of scrambled or *Rai1*-targeted  
345 shRNAs (24 hr prior to TTX/BIC), we found that control neurons expressing the scrambled  
346 shRNA exhibited the normal increase in mEPSC amplitude 24 hr post-TTX (sh-Ctrl Veh vs TTX:  
347  $n = 14-15$ ,  $p = 0.0003$ , Fig. 6B) and the distribution of mEPSCs exhibited a clear and  
348 multiplicative rightward shift in cumulative frequency plots. By contrast, mEPSCs from neurons  
349 expressing either of two distinct *Rai1* shRNAs did not significantly increase following TTX  
350 exposure, and in fact, demonstrated a nominal trend for a decrease in amplitude (Fig. 5A-C).  
351 Despite this clear impairment of homeostatic upscaling, *Rai1*-KD had no effect on the induction  
352 of homeostatic downscaling following network hyperactivation with BIC (Fig. 5D-F). Both control  
353 neurons expressing scrambled shRNA and those neurons expressing *Rai1* shRNA exhibited  
354 significantly decreased mEPSC amplitudes (sh-Ctrl Veh vs BIC:  $n = 14-17$ ,  $p = 0.0002$ , sh-*Rai1*  
355 #1 Veh vs. BIC:  $n = 9-8$ ,  $p=0.026$  and sh-*Rai1* #2 Veh vs. BIC:  $n = 7-8$ ,  $p = 0.0002$ , Fig. 6E), as  
356 well as a clear leftward multiplicative shift in mEPSC cumulative probability distributions. These  
357 results demonstrate that RAI is essential for homeostatic upscaling during activity suppression,

358 but is otherwise dispensable for homeostatic downscaling during periods of network  
359 hyperactivation.

360

361

## 362 Discussion

363  
364 Our Bru-seq method and analyses have provided novel insights into activity-dependent  
365 transcription. We found widespread transcriptional responses to network activity shifts and its  
366 high sensitivity in detecting transcriptional downregulation. Furthermore, our data indicate that  
367 most dynamically regulated genes altered by hyperactivity or suppression are unique, not  
368 reciprocal. (Fig. 1). This is particularly interesting given that gene expression studies have  
369 tended to focus on bidirectional regulation of target genes (e.g. *Arc*, *Fos*, *Homer1*, *Bdnf*)  
370 (Okuno, 2011). Our results agree with a nascent proteome study on rat hippocampal neurons, in  
371 which the authors observed unique, common, and reciprocal changes in protein synthesis upon  
372 TTX and BIC treatments (Schanzenbächer et al., 2016). These observations suggest that in  
373 addition to the reciprocal transcriptional changes of key factors, distinct transcriptional  
374 mechanisms to low- and high-activity states may underlie upscaling and downscaling. Our data  
375 therefore provide a resource to begin exploration of distinct molecular machineries underlying  
376 homeostatic up- and down-scaling and regulation of bidirectional activity-dependent  
377 transcription.

378  
379 Our data indicate that RAI1 is as a chromatin regulator that is selectively required for the  
380 transcription program of activity-suppression. Loss of RAI1 leads to misregulation of TTX-  
381 response genes, while leaving the uniquely BIC-genes unaffected (Fig. 2). In addition to its  
382 exclusive impact on TTX-response genes, an intriguing feature of RAI1 is its state-dependent  
383 roles in synaptic scaling. RAI1 deficiency shifts gene expression towards TTX-associated  
384 transcriptional states at baseline, and promotes the same transcriptional state once TTX is  
385 applied (Figs. 2 and 4). Under a hyperactivity condition, RAI1 is not required for transcription of  
386 TTX-associated genes (Fig. S7A, right panel). Since the correlation between *Rai1*-KD and TTX-  
387 associated transcription is stronger at baseline than TTX condition (baseline:  $r=0.53$ ; TTX:  
388  $r=0.32$ ), RAI1's influence on transcription appears greatest in the neurons without sensory  
389 inputs. In contrast to the RAI1's roles in TTX-associated transcription, RAI1 is clearly  
390 dispensable for BIC-triggered transcription and synaptic downscaling at any activity state (Figs.  
391 2 and 4). Thus, despite RAI1's opposite roles in regulating TTX-associated genes between low-  
392 and baseline activity states, the ultimate role of RAI1 appears consistent — a specialized  
393 transcriptional regulator for TTX-associated genes (Fig. 6). This selective requirement of RAI1 is  
394 further corroborated with electrophysiological assessments (Figs. 3 and 5)

395

396 The mechanisms by which RAI1 performs this function remain to be resolved. RAI1 is a  
397 nucleosome-binding protein, which can act as a transcriptional coactivator (Bi et al., 2005;  
398 Burns et al., 2010; Carmona-Mora et al., 2012; Carmona-Mora et al., 2010; Darvekar et al.,  
399 2013; Elsea and Williams, 2011; Girirajan et al., 2009; Huang et al., 2016). Key genes for  
400 cognitive development, including *Bdnf*, are shown to be direct targets of RAI1 (Burns et al.,  
401 2010; Girirajan et al., 2009; Molina et al., 2008; Williams et al., 2012). Our Bru-seq data indicate  
402 that, under baseline levels of activity, RAI1 suppresses TTX-induced genes, while the same set  
403 of genes are positively regulated by RAI1 during activity suppression (Fig.6). An integrative  
404 analysis of published ChIP-seq data suggest the majority of these genes are directly bound by  
405 RAI1 (Fig. S6A). It is plausible that RAI1's role in transcription switches between a coactivator  
406 and a corepressor, in response to altered activity states. Alternatively, RAI1 binding to gene  
407 promoters might be dynamically regulated during activity shifts, as was the case with L3MBTL1  
408 (Mao et al., 2018). TET3 and EHMT1/2 share their roles in homeostatic upscaling with RAI1  
409 (Benevento et al., 2016; Yu et al., 2015). While TET3 positively regulates transcription by  
410 removing CpG methylation (Ito et al., 2010), EHMT1/2 generally act as transcriptional  
411 repressors by placing the repressive histone mark, H3K9 methylation (Tachibana et al., 2005).  
412 How RAI1 functionally interacts with other chromatin regulators with roles in activity-dependent  
413 gene expression remains to be resolved.

414  
415 It is noteworthy that the four previously-characterized chromatin regulators in synaptic scaling,  
416 i.e. Tet3, EHMT2, L3MBTL1 were all identified based on their expression changes or their target  
417 histone modifications by network activity shifts (Benevento et al., 2016; Mao et al., 2018; Yu et  
418 al., 2015). However, we found no indication that expression or sub-cellular localization of RAI1  
419 is regulated by neuronal activity (Fig. S4-S5). The stable expression is similar to the case of  
420 EHMT1, in which EHMT1 levels remained constant while its binding partner EHMT2 levels  
421 varied in response to activity (Benevento et al., 2016). Chromatin regulators tend to show  
422 ubiquitous and stable expression. These observations raise a possibility that chromatin  
423 regulators that are implicated in human cognitive disorders could be involved in transcriptional  
424 response to activity shifts, even when their expression does not change during the process. Bru-  
425 seq and our analytical strategies employed in this study may prove useful to decipher how  
426 chromatin remodeling sculpts neural networks and plasticity.

427  
428 How do RAI1's new roles in synaptic scaling relate to cognitive function? As discussed earlier,  
429 RAI1 is implicated Smith-Magenis Syndrome (SMS) (Bi et al., 2004; Girirajan et al., 2005;

430 Slager et al., 2003) and mouse models of heterozygous and homozygous *Rai1*-KO displayed  
431 learning deficits, abnormal circadian behavior, altered social behavior, and obesity (Bi et al.,  
432 2005; Bi et al., 2007; Huang et al., 2018; Lacaria et al., 2013). Thorough characterization of cell-  
433 type specific *Rai1*-KO mice attributed the learning deficits to GABAergic interneurons rather  
434 than glutamatergic excitatory neurons (Huang et al., 2016). Since our mEPSC recording was  
435 performed in the pyramidal cells that incorporated *Rai1*-shRNA plasmid, and the transfection  
436 efficiency is low (~0.1%), RAI1's role in synaptic scaling is likely cell-autonomous to excitatory  
437 neurons. The lack of learning deficits in forebrain-specific *Rai1*-KO (*Emx1*-Cre: *Rai1*<sup>flox/flox</sup>) may  
438 suggest that RAI1's roles in synaptic scaling is irrelevant to cognitive function. Alternatively,  
439 synaptic scaling deficits by acute *Rai1* depletion might be compensated during development by  
440 unknown genes. The mice lacking RAI1 only in excitatory neurons may undergo compensatory  
441 neurodevelopment processes that involve RAI1-positive cell types, in which case the mouse  
442 model may not reflect neurodevelopmental deficits in human that is caused by *RAI1*  
443 heterozygosity in all cells. Additionally, the recent finding of reduced dendritic spine density in  
444 the prefrontal cortex of 4 week old *Rai1*-heterozygous mice, (Huang et al., 2018) may be result  
445 in part from impaired upscaling in RAI1-deficient excitatory neurons during development.

446  
447 In addition to cognitive function, sleep-wake cycle is another behavior in which RAI1's roles in  
448 synaptic scaling might be involved. Sleeping problems of SMS patients have been associated  
449 with inverted circadian rhythms (Boone et al., 2011; Elsea and Williams, 2011; Gropman et al.,  
450 2006; Potocki et al., 2000; Williams et al., 2012). Regulation of *CLOCK* gene by RAI1 has  
451 provided a molecular mechanism, which potentially explains the inverted circadian rhythm  
452 (Williams et al., 2012). Meanwhile, accumulating evidence has indicated that the brain  
453 undergoes synaptic downscaling during sleep, which normalizes the strengthened synaptic  
454 connection by experience during the awake state (Kuhn et al., 2016) (de Vivo et al., 2017;  
455 Diering et al., 2017). Our work demonstrates that reduced network activity elicits unique  
456 transcriptional responses (Fig. 1). Together, these observations predict that, during sleep,  
457 network activity becomes low due to fewer sensory inputs, reminiscent of TTX-treated neurons,  
458 which would trigger transcriptional responses that in turn upscale synapses during the awake  
459 state. It is tempting to speculate that RAI1-dependent synaptic upscaling might contribute to the  
460 higher synaptic efficacy during the awake state. Future studies should address how activity-  
461 dependent transcription and circadian gene oscillation interact, where RAI1 acts, and how  
462 disruption of these processes underlies cognitive and/or sleeping issues of SMS and related  
463 cognitive deficits.



464  
465 In addition to Bru-seq, several nascent RNA-seq approaches have been employed to examine  
466 gene expression in neurons. Schaukowitch *et al.* adopted Gro-seq, a nuclear run-on assay  
467 coupled with deep sequencing, to profile transcriptional activity in TTX-treated neurons  
468 (Schaukowitch *et al.*, 2017). Gro-seq involves isolation of nuclei and incorporation of BrUTP  
469 during the run-on reaction *in vitro* (Core *et al.*, 2008). We found that Gro-seq is more  
470 advantageous to detect unstable RNAs, such as eRNAs, compared to Bru-seq (Agarwal *et al.*,  
471 2017). The highly-sensitive detection of unstable RNAs is likely due the lack of active exosomes  
472 in the run-on reaction, which however points to a potential risk to observe *in vitro* artifacts. In  
473 contrast, Bru-seq faithfully monitors transcription within the cells at a given moment (Paulsen *et*  
474 *al.*, 2014; Paulsen *et al.*, 2013). A limitation of the Bru-seq approach is the lack of cell-type  
475 specificity. Recently, Zajackowski *et al.* reported nascent RNA-sequencing specifically in  
476 neurons that were depolarized by KCl (Zajackowski *et al.*, 2018). In this approach, neuron-  
477 specific RNA labeling was achieved by the *Synapsin I* promoter-driven expression of a  
478 *Toxoplasma gondii* enzyme, uracil phosphoribosyltransferase (UPRT). UPRT enables  
479 incorporation 5-ethynyl-uracil (5EU) into RNA. The labeled RNAs were biotinylated, isolated,  
480 and subjected for sequencing (Cleary *et al.*, 2005). The UPRT-5EU system identified over 3,000  
481 depolarization-regulated genes over the 3 hr KCl treatments, which likely detected both nascent  
482 transcripts and steady-state mRNAs. Cell-type specificity of the UPRT-5EU system comes with  
483 the cost of introducing the UPRT transgene and additional experimental steps to label RNAs.  
484 Recent transcriptome studies of brain cell types and single-cell RNA-seq have allowed us to  
485 retrospectively attribute the transcriptional changes in Bru-seq data to certain cell types to some  
486 extent (Fig. S2). Thus, one can choose the most suitable experimental approach for nascent  
487 RNA profiling depending on their goals of the study.

488  
489  
490

491 **Figure legends**

492

493 **Figure 1. Genome-wide transcriptional response to bi-directional activity alterations. (A)**

494 Experimental procedure. **(B)** UCSC Browser views of Bru-seq signals at *Arc* and *Fos*. Intronic

495 reads are characteristic of nascent RNA. **(C)** Differential gene expression analysis (DESeq2)

496 reveals widespread transcriptional changes in response to TTX and BIC ( $p_{\text{adj}} < 0.05$ ). **(D)** BIC-

497 response genes show a greater median fold change (Wilcoxon rank-sum test, upregulated

498 genes:  $p = 2.2 \times 10^{-16}$ , downregulated genes:  $p = 6.9 \times 10^{-16}$ ). Whiskers represent 1.5 times the

499 inter-quartile range (IQR) and the notch represents the 95% confidence interval of the median.

500 **(E)** The majority of TTX and BIC response genes are uniquely regulated (70%). 24% of genes

501 are reciprocally regulated and 6% are commonly regulated. **(F)** Downregulation of immediate

502 early gene in the TTX condition is captured more sensitively in Bru-seq data compared to

503 mRNA-seq data (Yu et al., 2015).

504

505 **Figure 2. *Rai1*-KD alters transcription of TTX-response genes at the baseline. (A)**

506 Validation of *Rai1*-KD with Western blot. Mouse forebrain neuron cultures were transduced with

507 lentivirus expressing sh-*Rai1* or sh-Ctrl for three days. **(B)** Number of DESeq2-called

508 differentially expressed genes (sh-Ctrl v sh-*Rai1*,  $p_{\text{adj}} < 0.05$ ) after Vehicle treatment. **(C)** Many

509 *Rai1*-KD DE-genes are TTX and BIC-response genes. **(D)** The fold changes of TTX- and BIC-

510 response genes by *Rai1*-KD at baseline. Note that *Rai1*-KD cultures displays transcriptional

511 profile similar to TTX-treated normal cultures.  $r =$  Spearman's rank correlation coefficient.

512

513 **Figure 3. *Rai1*-KD increases the synaptic efficacy at baseline activity condition. (A-D)**

514 Example traces and mean  $\pm$  SEM mEPSC amplitude (B), frequency (C), and decay time (D) for

515 cultured rat hippocampal primary neurons recorded after transient transfection (48 hr) with

516 either non-targeting shRNA (sh-Ctrl) or *Rai1* targeting shRNA (sh-*Rai1* #1 or #2) at DIV12-14.

517 Scale bar, 20 pA, 125 ms (sh-Ctrl, sh-*Rai1* #1,  $n = 21-21$ , and sh-Ctrl, sh-*Rai1* #2,  $n = 18-20$ )

518 **(E)** Cumulative distribution of mEPSC amplitudes of sh-Ctrl transfected neurons treated by

519 either vehicle or 1  $\mu$ M TTX (left) and sh-Ctrl or sh-*Rai1* transfected neurons (right). **(F)**

520 Representative images of surface GluA1 (sGluA1, fire), PSD-95 (green) and sGluA1 & PSD-95

521 (merge) of sh-Ctrl and sh-*Rai1* infected dendrites. Scale bar 10  $\mu$ m. Bar graph of mean sGluA1

522 signal intensity in PSD-95 positive regions for vehicle or TTX ( $n = 13-12$ ), and sh-Ctrl or sh-*Rai1*

523 (n = 6-6) treated neurons. All bar graphs represent mean  $\pm$  SEM, and comparisons between sh-  
524 Ctrl and sh-*Rai1* were made with unpaired Student's t-tests. \*p < 0.05, \*\*p < 0.01, \*\*\*p < 0.001.

525

526 **Figure 4. RAI1 positively regulates the transcriptional response to TTX. (A)** The fold  
527 changes of TTX- and BIC-response genes in cultures treated by sh-Ctrl or sh-*Rai1* (Wilcoxon  
528 rank-sum test). **(B)** Number of DESeq2-called differentially expressed genes (sh-Ctrl v sh-*Rai1*,  
529  $p_{\text{adj}} < 0.05$ ) after TTX, Vehicle, or BIC treatment. **(D)** RAI1-dependent gene ontologies (Biological  
530 Process,  $p_{\text{adj}} < 0.005$ ) discovered by RNA-Enrich (Lee et al., 2016) and filtered by ReviGO  
531 software (Supek et al., 2011). **(E)** RPKM values of four Sig-genes downregulated by *Rai1*-KD in  
532 the TTX-treated condition. The Sig-genes represent “neurotransmitter transport” ( $p_{\text{adj}} = 9.3 \times 10^{-8}$ ),  
533 the top-downregulated Biological Processes. The remaining Sig-genes are shown in Figure S7.  
534 Note slight but consistent inter-replicate changes upon *Rai1*-KD.  $r =$  Spearman's rank correlation  
535 coefficient. In the box plots, whiskers represent 1.5 times IQR and the notch represents the 95%  
536 confidence interval of the median.

537

538 **Figure 5. Rai1-KD impairs synaptic upscaling but not synaptic downscaling. (A-C)**  
539 Representative mEPSC traces recorded from neurons transfected with either sh-Ctrl or sh-*Rai1*  
540 and treated with either vehicle or 1  $\mu\text{M}$  TTX. Scale bar, 20 pA, 125 ms. **(B)** mEPSC amplitude  
541 of sh-Ctrl, sh-*Rai1* #1 and sh-*Rai1* #2 treated either with vehicle or TTX (sh-Ctrl Veh, TTX n =  
542 14-15, sh-*Rai1* #1 Veh, TTX n = 7-7, sh-*Rai1* #2 Veh, TTX n = 6-8). **(C)** Cumulative distribution  
543 of mEPSC amplitude of sh-Ctrl (black), sh-*Rai1* (teal; sh-*Rai1* #1 + #2) treated with vehicle  
544 (solid line) or TTX (dotted line). **(D-F)** Representative mEPSC traces recorded from neurons  
545 transfected with either sh-Ctrl or sh-*Rai1* and treated with either vehicle or 10  $\mu\text{M}$  BIC. Scale  
546 bar, 20 pA, 125 ms. **(E)** mEPSC amplitude of sh-Ctrl, sh-*Rai1* #1 and sh-*Rai1* #2 treated either  
547 with vehicle or BIC (sh-Ctrl Veh, BIC n = 14-17, sh-*Rai1* #1 Veh, BIC n = 9-8, sh-*Rai1* #2 Veh,  
548 BIC n = 7-8). **(F)** Cumulative distribution of mEPSC amplitude of sh-Ctrl (black), sh-*Rai1* (blue;  
549 sh-*Rai1* #1 + #2) treated with vehicle (solid line) or BIC (dotted line). All bar graphs are  
550 represented as mean  $\pm$  SEM. One-way ANOVA, followed by post-hoc Fisher's LSD test were  
551 performed. \*p < 0.05, \*\*p < 0.01, \*\*\*p < 0.001.

552

553 **Figure 6. RAI1's role as a state-dependent transcriptional regulator of TTX-response**

554 **genes:** RAI1 alters synaptic efficacy through selective regulation of TTX-response genes under  
555 baseline and activity-suppressed states.

556 **Supplementary Figure legends**

557

558 **Figure S1. Bru-seq vs. mRNA-seq. (A)** Overlap of DE genes in Bru-seq and mRNA-seq. DE  
559 genes were called using identical DESeq2 parameters. mRNA-seq datasets were obtained from  
560 from (Yu et al., 2015). **(B)** Expression changes of DE-genes upon BIC and TTX treatments in  
561 Bru-seq and mRNA-seq (4 hr post-treatment) (Yu et al., 2015). **(C)** Comparison of Bru-seq data  
562 and mRNA-seq data of 6 hr post-treatment (Schaukowitch et al., 2017).

563 **Figure S2. Cell-type analysis of the primary forebrain neuron cultures. (A)** Representative  
564 immunofluorescence images of the primary forebrain neuron culture (DIV17) with antibodies  
565 against NeuN, Gad67, GFAP, or Olig2. Nuclei were visualized by DAPI. Scale bar: 20  $\mu$ m. **(B)**  
566 Quantification of cell types. Cell types were determined as follow. Excitatory neurons; NeuN(+),  
567 Gad67(-), Inhibitory neurons; NeuN(+), Gad67(+), Astrocytes; NeuN(-),GFAP(+), Olig2(-).  
568 33.5%, and Oligodendrocyte lineage cells; NeuN(-), Olig2(+). We did not observe cells with  
569 CD11b, a microglia marker. Each cell type was calculated as the % of all DAPI+ cells and  
570 shown as an average of two biological replicates. **(C)** The number of cell type-specific genes  
571 and their response to TTX or BIC in the Bru-seq data. Cell type-specific genes were obtained  
572 from mRNA-seq data of separated cells by immunopanning of P7-P17 mouse cortices (Zhang et  
573 al., 2014). Oligo: cells within the oligodendrocyte lineage. NR: Non-responsive genes. Both:  
574 Genes that respond to both TTX and BIC.

575 **Figure S3. RAI1 expression in publicly-available datasets. (A)** *Rai1* mRNA levels in neurons  
576 and non-neuronal cells of the adult mouse cortices (Zhang et al., 2014). **(B)** *Rai1* mRNA levels  
577 in single cell mRNA-seq data of mouse visual cortex (Tasic et al., 2016).

578 **Figure S4. RAI1 protein level during neuronal-activity shifts.** Rat cortical neurons (DIV14)  
579 were treated with TTX (T), BIC (B) or vehicle (V) for the indicated times. Cells were harvested in

580 3 biological replicates and analyzed by Western blot with a custom anti-RAI1 antibody. The 270-  
581 kDa full-length RAI1 protein band intensity was visualized and quantified in the linear range  
582 using LI-COR C-Digit and Image Studio software. Statistical significance was evaluated with  
583 one-way ANOVA. No treatment reached  $p < 0.05$ .

584 **Figure S5. Sub-cellular localization of RAI1 during neuronal-activity shifts.** Sub-cellular  
585 RAI1 localization was assessed by immunofluorescence in the mouse forebrain neuron culture  
586 (DIV17) using an anti-RAI1 antibody. RAI1 displayed nuclear localization in excitatory and  
587 inhibitory neurons. RAI1 did not show any sub-cellular or sub-nuclear localization by TTX and  
588 BIC treatments for 4 hr. We obtained similar results at other timepoints (15 minutes, 1 hr, 2 hr, 8  
589 hr, and 24 hr, data not shown).

590 **Figure S6. Integrative analysis of the Bru-seq, RAI1 ChIP-seq, and mRNA-seq data of**  
591 ***Rai1*-knockout mice. (A)** RAI1 occupancy at the promoters of TTX- and BIC-response genes.  
592 RAI1 ChIP-seq data were obtained from the cortices of 8-week old mice (Huang et al., 2016).  
593 RAI1 occupies ~80% of activity-dependent genes with no apparent enrichment in any group.  
594 Promoters were defined by  $\pm 1$  kb of annotated transcription start sites and overlap with RAI1  
595 ChIP-seq peaks were computed using MACS2 (Zhang et al., 2008). **(B)** Transcription of  
596 reciprocal genes in the *Rai1*-KD culture at baseline show a positive correlation with TTX-treated  
597 transcriptome and a negative correlation with BIC-treated transcriptome of the normal culture.  
598 **(C)** Premature TTX-response of *Rai1*-KD culture is still observed after excluding the RAI1-  
599 dependent genes at baseline. **(D)** Expression of TTX- and BIC-response genes in the pan-  
600 neuronal *Rai1*-knockout cortex. mRNA-seq data were obtained from 3 week-old *Rai1*<sup>flox/flox</sup>.  
601 *Nestin*-Cre and control mice (Huang et al., 2016). Fold changes in KO vs Control mice were  
602 calculated using the RPKM values. The *Rai1*-KO mRNA expression shows a trend of TTX-  
603 treated transcription states.

604 **Figure S7. Impact of RAI1 loss on transcription after TTX- or BIC-treatments. (A)** The fold  
605 changes of TTX- and BIC-response genes by *Rai1*-KD after BIC or TTX treatment. **(B)** RPKM  
606 values of Bru-seq data are represented for Sig-genes of “neurotransmitter transport”, which was  
607 downregulated by *Rai1*-KD in the post-TTX condition ( $p_{\text{adj}}$ :  $9.3 \times 10^{-8}$ ). Note consistent reduction  
608 in RPKM across biological replicates in *Rai1*-KD culture in the TTX-treated condition.

609

610

## 611 **Materials and Methods**

612

### 613 **Primary neuron culture and shRNA-mediated *Rai1*-KD**

614 The cortices and hippocampi from E18.5 mouse pups were pooled into biological replicates with  
615 identical female-male ratios. Sex of the pups was determined by PCR using primers for the *ZFY*  
616 gene (Table S5). Primary culture of neurons was carried out as previously described (Iwase et  
617 al., 2016) (Vallianatos et al., 2018). Briefly, dissociated tissues were plated at 4 million cells/6  
618 cm poly-D-lysine-coated plate (Sigma) grown in Neurobasal Media supplemented with B27  
619 (Gibco, #17504044). No mitotic inhibitors were added, allowing the growth of non-neuronal  
620 cells. Half the culture medium was freshened every 3-5 days. On DIV 14, cells were infected  
621 with lentiviral shRNA as previously described (Vallianatos et al., 2018). Lentivirus were  
622 generated using co-transfection into HEK-293t cells of psPAX2 (Addgene, 12260), pMD2.G  
623 (AddGene, 12259) and pLKO plasmids containing shRNA against *Rai1* untranslated region  
624 (*Rai1*-shRNA #1: Sigma, TRCN0000124984) or coding region (*Rai1*-shRNA #2: Sigma,  
625 TRCN0000328334) or scramble shRNA (Sigma, SHC202). For Bru-seq experiments, we used  
626 SHC202 and *Rai1*-shRNA #1. For electrophysiology, we used SHC202, *Rai1*-shRNA #1 and #2,  
627 whose target sequences are identical between mouse and rat. The conditioned media  
628 containing lentiviruses was collected, concentrated with Lenti-X concentrator (Takara, 631232),  
629 and resuspended in Neurobasal medium, and stored at  $-80^{\circ}\text{C}$ . The titer of lentivirus was  
630 determined by survival of transduced 293 cells under puromycin and a comparable amount of  
631 virus that result in  $>90\%$  survival of infected neurons was used for all biological replicates.  
632 Puromycin was not added to cultured neurons for experiments.

633

### 634 **Network activity alterations and Bru-seq experiments**

635 On DIV17, cells were treated with bicuculline-methiodide (Abcam, ab120108, 20  $\mu\text{M}$ ), TTX  
636 (Tocris, 1069, 1  $\mu\text{M}$ ), or vehicle (sterile water), for 4 hours. 3 hours and 40 minutes post  
637 treatment, bromouridine (Bru, Sigma, dissolved in PBS) was added to cultures at 2 mM final  
638 concentration. Cultures were harvested in Tri-reagent BD (Sigma, T3809) and frozen  
639 immediately. RNA was purified using phenol-chloroform extraction and isopropanol  
640 precipitation, treated with DNase-I (NEB) then fragmented by high-magnesium, high  
641 temperature incubation. From 1  $\mu\text{g}$  of total RNA, enrichment of Bru-containing RNA and library  
642 preparation were performed as previously described (Paulsen et al., 2014; Paulsen et al., 2013)



643 with minor modifications. We designed custom adaptors (Table S5) which were directly ligated  
644 to the 3' ends of RNA using RNA ligase 1 (NEB Cat. No. M0437) and truncated RNA ligase KQ  
645 (NEB M0373). Bromouridine-labeled RNAs were immunoprecipitated using anti-BrdU antibody  
646 (Santa Cruz Biotechnology, sc-32323). Enriched RNAs were reverse transcribed using a primer  
647 complementary to the RNA adaptor (Table S5). Adaptor duplexes with 5- or 6-base pair random  
648 nucleotide overhangs were ligated to the 3' end of the cDNA (Table S5). The cDNA libraries  
649 were amplified using primers that carry Illumina indices, then 180-400 bp DNA fragments were  
650 isolated using by an agarose gel. The nucleotide sequences of primers used for library  
651 amplification are found in Table S5. The libraries were subjected to single-end 50-bp  
652 sequencing using Illumina HiSeq 2000 platform. We performed 2 to 3 biological replicates for all  
653 drug treatment and knockdown conditions.

654

## 655 **Sequencing data analysis**

656 After confirming the quality of sequencing data by FastQC, reads were mapped to mm9  
657 reference genome using Bowtie2 (Langmead and Salzberg, 2012) and annotated with Tophat2  
658 (Kim et al., 2013). Adaptors were trimmed using BBDUK ([http://jgi.doe.gov/data-and-tools/bb-](http://jgi.doe.gov/data-and-tools/bb-tools/)  
659 [tools/](http://jgi.doe.gov/data-and-tools/bb-tools/)), when 2-30 bp on the left of the read matched the predicted adaptor ( $k=30$ ,  $mink=2$ ,  
660  $minlength=15$ ,  $hdist=1$ ). Bru-seq signals were quantified by FeatureCounts (Liao et al., 2014).  
661 We excluded *Rn45s*, *Lars2*, *Rn4.5s*, *Cdk8*, *Zc3h7a* and the mitochondrial chromosome to avoid  
662 counts of overamplified genes that may skew RPKM normalization. DE-genes were identified  
663 using DESeq2 (Love et al., 2014) using the same parameters for the Bru-seq data and three  
664 published mRNA-seq datasets of neuron culture and *Rai1*-KO mice (Huang et al., 2016;  
665 Schaukowitch et al., 2017; Yu et al., 2015). We also used DESeq2 to calculate RPKM  
666 expression values across the entire genic regions, including introns. Gene ontology was  
667 examined using RNA-Enrich (Lee et al., 2016). Significance cutoff for reporting Sig-genes was  
668 an unadjusted  $p$  value  $< 0.05$ . We only presented GO terms that contain 5 to 250 genes.

669

## 670 **Western blot**

671 To validate *Rai1*-KD in mouse forebrain neuron culture, *Rai1*-KD and control cultures were  
672 harvested at 3 days after lentiviral transduction and subjected to Western blot analysis as  
673 described previously (Iwase et al., 2016). RAI1 antibodies were generated by immunizing

674 rabbits with a synthesized RAI1 peptide (aa 28 to 42, ENYRQPGQAGLSCDR, Thermo Fisher  
675 Scientific), followed by affinity purification using the peptide as the affinity ligand (Thermo Fisher  
676 Scientific). Anti-PCNA antibody (Santa Cruz sc-56, 1:1000) was used for a loading control. For  
677 analysis of RAI1 level during activity shifts, the cortices from E18.5 rat pups were dissected,  
678 dissociated, and plated at 700,000 cells/well in a PDL-coated 6-well dish. Neurons were grown  
679 in Neurobasal/B27 medium for 14 DIV. Vehicle (1% water), TTX (1  $\mu$ M) or BIC (20  $\mu$ M) were  
680 added to the culture and cells were harvested with a 1:1 mixture of 2X Laemmli buffer (BioRad,  
681 1610737, 1:20 beta-mercaptoethanol) and radioimmunoprecipitation assay (RIPA) buffer  
682 supplemented with 50 mM BGP and 1 mM Na<sub>3</sub>VO<sub>4</sub>. Protein samples were boiled for 10  
683 minutes at 100°C. 10-15  $\mu$ g of each sample was loaded per lane, separated by 7.5% SDS-  
684 PAGE, and transferred onto PVDF membrane (Millipore IPVH00010). Membranes were then  
685 blocked with 5% skim milk or 3% blotting-grade blocker (BioRad 1706404) for 1 hr, probed  
686 overnight with the following primary antibodies diluted in 3% BSA (Fisher Scientific BP1600):  
687 RAI1 (1:1000), beta-actin (Sigma A5441, 1:20,000). Horseradish peroxidase (HRP)-conjugated  
688 secondary IgG antibodies (EMD Millipore AP132P or AQ160P) were also diluted in 3% BSA,  
689 and the HRP signal was developed with various chemiluminescent substrates from Thermo  
690 Fisher Scientific (34080 or 34095) and Li-COR Biosciences (926-95000). Protein band intensity  
691 was visualized and quantified in the linear range using LI-COR C-Digit and Image Studio  
692 software. Results were compared using one-way ANOVA.

693

## 694 **Immunocytochemistry**

695 Two biological replicates of forebrain neuron cultures were obtained from E17.5 mouse  
696 embryos. On DIV19, they were fixed with 4% paraformaldehyde in 16% sucrose/PBS,  
697 permeabilized with 0.25% Triton-X in 1X PBS, blocked for 30 minutes with 10% bovine albumin  
698 serum (Sigma A2153), and overnight incubation of antibodies in 3% BSA at 4°C. Primary  
699 antibodies used in the study are following. anti-NeuN (EMD Millipore, MAB377, 1:1000), anti-  
700 GFAP (NeuroMab N206A/8, 1:1000), anti-MAP2 (EMD Millipore, AB5543, 1:1000), anti-OLIG2  
701 (EMD Millipore, AB9610, 1:1000), anti-CD11b (Abcam, ab133357, 1:500), anti-GAD67 (Santa  
702 Cruz, sc-5602, 1:1000). Secondary antibodies (Invitrogen Alexa Fluor 488, 555, or 647) were  
703 applied for 45 min at room temperature. Fluorescence images were acquired using an Olympus  
704 BX61 fluorescence microscope (60X oil-immersion lens) and CellSense software.  
705 Immunoreactivity was quantified semi-automatedly using a custom ImageJ script after  
706 confirming specific staining by visual inspection.

## 707 **Electrophysiology**

708 All animal use followed NIH guidelines and was in compliance with the University of Michigan  
709 Committee on Use and Care of Animals. Dissociated postnatal (P0-2) rat hippocampal neuron  
710 cultures were prepared as previously described (Henry et al., 2012). Neurons were transfected  
711 with 1.0 µg of scrambled or *Rai1*-shRNA-expressing plasmids with the CalPhos Transfection kit  
712 (ClonTech) or Lipofectamine 2000 (ThermoFisher Scientific) according to the manufacturer's  
713 protocols. All experiments were performed 48 hours after transfection. mEPSCs were recorded  
714 from a holding potential of – 70 mV with an Axopatch 200B amplifier from neurons bathed in  
715 HEPES buffered saline (HBS) containing: 119 mM NaCl, 5 mM KCl, 2 mM CaCl<sub>2</sub>, 2 mM MgCl<sub>2</sub>,  
716 30 mM Glucose, 10 mM HEPES (pH 7.4) plus 1 µM TTX and 10 µM bicuculine; mEPSCs were  
717 analyzed with Synaptosoft MiniAnalysis software. Whole-cell pipette internal solutions  
718 contained: 100 mM cesium gluconate, 0.2 mM EGTA, 5 mM MgCl<sub>2</sub>, 2 mM ATP, 0.3 mM GTP,  
719 40 mM HEPES (pH 7.2). Statistical differences between experimental conditions were  
720 determined by unpaired Student's t-tests (Fig. 3) or one-way ANOVA followed by post-hoc  
721 Fisher's LSD test (Fig. 6).

## 722 **Surface GluA1 expression analysis**

723 Surface GluA1 staining was conducted as previously described with slight modification (Henry  
724 et al., 2012). On DIV12, rat cultured hippocampal cells were infected either with lentivirus  
725 carrying sh-Ctrl or sh-*Rai1* as described above. After 48 hours of incubation, cultured cells were  
726 live-labeled with rabbit anti-GluA1 antibody (EMD Millipore, ABN241, 1:1000) for 20 min at  
727 37°C, fixed with 2% paraformaldehyde, and further labeled with mouse anti-PSD-95 (EMD  
728 Millipore, MAB1596, 1:1000). Goat anti-mouse Alexa 488 and Goat anti-rabbit Alexa 555  
729 secondary antibodies (Abcam, 1:500) were applied for 60 min at room temperature to visualize  
730 PSD-95 and GluA1 staining. Images of PSD-95 and GluA1 were acquired using an inverted  
731 Olympus FV1000 laser-scanning confocal microscope using a Plan-Apochromat 63 X /1.4 oil  
732 objective. Then, synaptic GluA1 was defined as a particle that occupied > 10% of the PSD-95  
733 positive area, and the average integrated intensity of synaptic GluA1 was calculated using a  
734 custom macro for ImageJ. Statistical differences between experimental conditions were  
735 determined by unpaired Student's t-tests.

736

737

738 **Data Availability**

739 Sequencing data generated for this study have been submitted to the NCBI Gene Expression  
740 Omnibus (GEO; <http://www.ncbi.nlm.nih.gov/geo/>) under accession number GSE121749.

741

742

743 **Acknowledgements**

744 We thank Dr. Saurabh Agarwal for providing technical support for Bru-seq experiments and  
745 scripts for mapping and annotating RNA-seq data. P.M.G. was supported by an NSF Graduate  
746 Research Fellowship Program (DGE #1256260). T.T. was supported by PRISMS post-doctoral  
747 fellowship. A.C. was supported by an NIH NRSA fellowship (18-PAF03228). M.A.W. was  
748 supported by a Summer Fellowship from the University of Michigan Language, Sciences and  
749 Arts Honors Program. This work was supported by the University of Michigan Medical School  
750 (to S.I.), March of Dimes Foundation (to S.I.), NIH (R01NS089896 and R21NS104774 to S.I.;  
751 R01NS097498 to M.A.S), the Farrehi research fund (to S.I.). The authors thank the members of  
752 Iwase and Sutton laboratories for discussion and support.

753

754

755

756 **References**

757

758 Abbott, L.F., and Nelson, S.B. (2000). Synaptic plasticity: taming the beast. *Nat*  
759 *Neurosci* 3, 1178.

760 Agarwal, S., Garay, P.M., Porter, R.S., Brookes, E., Murata-Nakamura, Y., Macfarlan,  
761 T.S., Ren, B., and Iwase, S. (2017). LSD1/KDM1A Maintains Genome-wide  
762 Homeostasis of Transcriptional Enhancers. *bioRxiv*.

763 Alarcón, J.M., Malleret, G., Touzani, K., Vronskaya, S., Ishii, S., Kandel, E.R., and  
764 Barco, A. (2004). Chromatin Acetylation, Memory, and LTP Are Impaired in CBP+/-  
765 Mice: A Model for the Cognitive Deficit in Rubinstein-Taybi Syndrome and Its  
766 Amelioration. *Neuron* 42, 947-959.

767 Allen Institute for Brain Science (2015). Allen Developing Mouse Brain Atlas [Internet].  
768 Available from <http://developingmouse.brain-map.org>.

769 Bateup, H.S., Johnson, C.A., Denefrio, C.L., Saulnier, J.L., Kornacker, K., and Sabatini,  
770 B.L. (2013). Excitatory/inhibitory synaptic imbalance leads to hippocampal  
771 hyperexcitability in mouse models of tuberous sclerosis. *Neuron* 78, 510-522.

772 Benevento, M., Iacono, G., Selten, M., Ba, W., Oudakker, A., Frega, M., Keller, J.,  
773 Mancini, R., Lewerissa, E., Kleefstra, T., *et al.* (2016). Histone Methylation by the  
774 Kleefstra Syndrome Protein EHMT1 Mediates Homeostatic Synaptic Scaling. *Neuron*  
775 91, 341-355.

776 Benito, E., and Barco, A. (2015). The neuronal activity-driven transcriptome. *Mol*  
777 *Neurobiol* 51, 1071-1088.

778 Bi, W., Ohyama, T., Nakamura, H., Yan, J., Visvanathan, J., Justice, M.J., and Lupski,  
779 J.R. (2005). Inactivation of Rai1 in mice recapitulates phenotypes observed in  
780 chromosome engineered mouse models for Smith-Magenis syndrome. *Hum Mol Genet*  
781 14, 983-995.

782 Bi, W., Saifi, G.M., Shaw, C.J., Walz, K., Fonseca, P., Wilson, M., Potocki, L., and  
783 Lupski, J.R. (2004). Mutations of RAI1, a PHD-containing protein, in nondeletion  
784 patients with Smith-Magenis syndrome. *Hum Genet* 115, 515-524.

785 Bi, W., Yan, J., Shi, X., Yuva-Paylor, L.a., Antalffy, B.a., Goldman, A., Yoo, J.W.,  
786 Noebels, J.L., Armstrong, D.L., Paylor, R., *et al.* (2007). Rai1 deficiency in mice causes  
787 learning impairment and motor dysfunction, whereas Rai1 heterozygous mice display  
788 minimal behavioral phenotypes. *Hum Mol Genet* 16, 1802-1813.

789 Boone, P.M., Reiter, R.J., Glaze, D.G., Tan, D.X., Lupski, J.R., and Potocki, L. (2011).  
790 Abnormal circadian rhythm of melatonin in Smith-Magenis syndrome patients with RAI1  
791 point mutations. *Am J Med Genet A* 155A, 2024-2027.

- 792 Bourgeron, T. (2015). From the genetic architecture to synaptic plasticity in autism  
793 spectrum disorder. *Nature Reviews Neuroscience* 16, 551.
- 794 Bourtchouladze, R., Lidge, R., Catapano, R., Stanley, J., Gossweiler, S., Romashko, D.,  
795 Scott, R., and Tully, T. (2003). A mouse model of Rubinstein-Taybi syndrome: Defective  
796 long-term memory is ameliorated by inhibitors of phosphodiesterase 4. *Proceedings of*  
797 *the National Academy of Sciences* 100, 10518.
- 798 Brakeman, P.R., Lanahan, A.A., O'Brien, R., Roche, K., Barnes, C.A., Huganir, R.L.,  
799 and Worley, P.F. (1997). Homer: a protein that selectively binds metabotropic glutamate  
800 receptors. *Nature* 386, 284.
- 801 Bramham, C.R., Worley, P.F., Moore, M.J., and Guzowski, J.F. (2008). The Immediate  
802 Early Gene *Arc*/*Arg3.1*: Regulation, Mechanisms, and Function.  
803 *The Journal of Neuroscience* 28, 11760-11767.
- 804 Burns, B., Schmidt, K., Williams, S.R., Kim, S., Girirajan, S., and Elsea, S.H. (2010).  
805 *Rai1* haploinsufficiency causes reduced *Bdnf* expression resulting in hyperphagia,  
806 obesity and altered fat distribution in mice and humans with no evidence of metabolic  
807 syndrome. *Hum Mol Genet* 19, 4026-4042.
- 808 Carmona-Mora, P., Canales, C.P., Cao, L., Perez, I.C., Srivastava, A.K., Young, J.I.,  
809 and Walz, K. (2012). *RAI1* Transcription Factor Activity Is Impaired in Mutants  
810 Associated with Smith-Magenis Syndrome. *PLoS One* 7.
- 811 Carmona-Mora, P., Encina, C.a., Canales, C.P., Cao, L., Molina, J., Kairath, P., Young,  
812 J.I., and Walz, K. (2010). Functional and cellular characterization of human *Retinoic*  
813 *Acid Induced 1 (RAI1)* mutations associated with Smith-Magenis Syndrome. *BMC Mol*  
814 *Biol* 11, 63-63.
- 815 Cleary, M.D., Meiering, C.D., Jan, E., Guymon, R., and Boothroyd, J.C. (2005).  
816 Biosynthetic labeling of RNA with uracil phosphoribosyltransferase allows cell-specific  
817 microarray analysis of mRNA synthesis and decay. *Nat Biotechnol* 23, 232.
- 818 Core, L.J., Waterfall, J.J., and Lis, J.T. (2008). Nascent RNA Sequencing Reveals  
819 Widespread Pausing and Divergent Initiation at Human Promoters. *Science* 322, 1845.
- 820 Darvekar, S., Johnsen, Sylvia S., Eriksen, Agnete B., Johansen, T., and Sjøttem, E.  
821 (2012). Identification of two independent nucleosome-binding domains in the  
822 transcriptional co-activator SPBP. *Biochem J* 442, 65-75.
- 823 Darvekar, S., Rekdal, C., Johansen, T., and Sjøttem, E. (2013). A Phylogenetic Study of  
824 SPBP and *RAI1*: Evolutionary Conservation of Chromatin Binding Modules. *PLoS One*  
825 8, 1-11.
- 826 de Vivo, L., Bellesi, M., Marshall, W., Bushong, E.A., Ellisman, M.H., Tononi, G., and  
827 Cirelli, C. (2017). Ultrastructural evidence for synaptic scaling across the wake/sleep  
828 cycle. *Science* 355, 507.

- 829 Diering, G.H., Nirujogi, R.S., Roth, R.H., Worley, P.F., Pandey, A., and Haganir, R.L.  
830 (2017). Homer1a drives homeostatic scaling-down of excitatory synapses during sleep.  
831 *Science* 355, 511.
- 832 Ebert, D.H., and Greenberg, M.E. (2013). Activity-dependent neuronal signalling and  
833 autism spectrum disorder. *Nature* 493, 327-337.
- 834 Elsea, S.H., and Williams, S.R. (2011). Smith-Magenis syndrome: haploinsufficiency of  
835 RAI1 results in altered gene regulation in neurological and metabolic pathways. *Expert*  
836 *Rev Mol Med* 13, e14-e14.
- 837 Fernandes, D., and Carvalho, A.L. (2016). Mechanisms of homeostatic plasticity in the  
838 excitatory synapse. *J Neurochem*.
- 839 Fragoso, Y.D., Stoney, P.N., Shearer, K.D., Sementilli, A., Nanescu, S.E., Sementilli, P.,  
840 and McCaffery, P. (2014). Expression in the human brain of retinoic acid induced 1, a  
841 protein associated with neurobehavioural disorders. *Brain structure & function*.
- 842 Girirajan, S., Elsas, L.J., Devriendt, K., and Elsea, S.H. (2005). RAI1 variations in  
843 Smith-Magenis syndrome patients without 17p11.2 deletions. *J Med Genet* 42, 820-828.
- 844 Girirajan, S., Truong, H.T., Blanchard, C.L., and Elsea, S.H. (2009). A functional  
845 network module for Smith-Magenis syndrome. *Clin Genet* 75, 364-374.
- 846 Glock, C., Heumüller, M., and Schuman, E.M. (2017). mRNA transport & local  
847 translation in neurons. *Curr Opin Neurobiol* 45, 169-177.
- 848 Gropman, A.L., Duncan, W.C., and Smith, A.C. (2006). Neurologic and developmental  
849 features of the Smith-Magenis syndrome (del 17p11.2). *Pediatr Neurol* 34, 337-350.
- 850 Guan, J.S., Haggarty, S.J., Giacometti, E., Dannenberg, J.H., Joseph, N., Gao, J.,  
851 Nieland, T.J., Zhou, Y., Wang, X., Mazitschek, R., *et al.* (2009). HDAC2 negatively  
852 regulates memory formation and synaptic plasticity. *Nature* 459, 55-60.
- 853 Gupta-Agarwal, S., Franklin, A.V., Deramus, T., Wheelock, M., Davis, R.L., McMahon,  
854 L.L., and Lubin, F.D. (2012). G9a/GLP histone lysine dimethyltransferase complex  
855 activity in the hippocampus and the entorhinal cortex is required for gene activation and  
856 silencing during memory consolidation. *J Neurosci* 32, 5440-5453.
- 857 Gupta-Agarwal, S., Jarome, T.J., Fernandez, J., and Lubin, F.D. (2014). NMDA  
858 receptor- and ERK-dependent histone methylation changes in the lateral amygdala  
859 bidirectionally regulate fear memory formation. *Learn Mem* 21, 351-362.
- 860 Guzman-Karlsson, M.C., Meadows, J.P., Gavin, C.F., Hablitz, J.J., and Sweatt, J.D.  
861 (2014). Transcriptional and epigenetic regulation of Hebbian and non-Hebbian plasticity.  
862 *Neuropharmacology* 80, 3-17.

- 863 Hasel, P., Dando, O., Jiwaji, Z., Baxter, P., Todd, A.C., Heron, S., Markus, N.M.,  
864 McQueen, J., Hampton, D.W., Torvell, M., *et al.* (2017). Neurons and neuronal activity  
865 control gene expression in astrocytes to regulate their development and metabolism.  
866 *Nat Commun* 8, 15132.
- 867 Hermey, G., Blüthgen, N., and Kuhl, D. (2017). Neuronal activity-regulated alternative  
868 mRNA splicing. *The International Journal of Biochemistry & Cell Biology* 91, 184-193.
- 869 Hrvatin, S., Hochbaum, D.R., Nagy, M.A., Cicconet, M., Robertson, K., Cheadle, L.,  
870 Zilionis, R., Ratner, A., Borges-Monroy, R., Klein, A.M., *et al.* (2018). Single-cell  
871 analysis of experience-dependent transcriptomic states in the mouse visual cortex. *Nat*  
872 *Neurosci* 21, 120-129.
- 873 Huang, W.-H., Wang, D.C., Allen, W.E., Klope, M., Hu, H., Shamloo, M., and Luo, L.  
874 (2018). Early adolescent *Rai1* reactivation reverses transcriptional and social interaction  
875 deficits in a mouse model of Smith–Magenis syndrome. *Proceedings of the National*  
876 *Academy of Sciences* 115, 10744.
- 877 Huang, W.H., Guenther, C.J., Xu, J., Nguyen, T., Schwarz, L.A., Wilkinson, A.W.,  
878 Gozani, O., Chang, H.Y., Shamloo, M., and Luo, L. (2016). Molecular and Neural  
879 Functions of *Rai1*, the Causal Gene for Smith-Magenis Syndrome. *Neuron* 92, 392-406.
- 880 Ibata, K., Sun, Q., and Turrigiano, G.G. (2008). Rapid synaptic scaling induced by  
881 changes in postsynaptic firing. *Neuron* 57, 819-826.
- 882 Igaz, L.M., Vianna, M.R.M., Medina, J.H., and Izquierdo, I. (2002). Two Time Periods of  
883 Hippocampal mRNA Synthesis Are Required for Memory Consolidation of Fear-  
884 Motivated Learning. *The Journal of Neuroscience* 22, 6781.
- 885 Ito, S., D'Alessio, A.C., Taranova, O.V., Hong, K., Sowers, L.C., and Zhang, Y. (2010).  
886 Role of Tet proteins in 5mC to 5hmC conversion, ES-cell self-renewal and inner cell  
887 mass specification. *Nature* 466, 1129.
- 888 Iwase, S., Brookes, E., Agarwal, S., Badeaux, A.I., Ito, H., Vallianatos, C.N., Tomassy,  
889 G.S., Kasza, T., Lin, G., Thompson, A., *et al.* (2016). A Mouse Model of X-linked  
890 Intellectual Disability Associated with Impaired Removal of Histone Methylation. *Cell*  
891 *Rep* 14, 1000-1009.
- 892 Kerimoglu, C., Agis-Balboa, R.C., Kranz, A., Stilling, R., Bahari-Javan, S., Benito-  
893 Garagorri, E., Halder, R., Burkhardt, S., Stewart, A.F., and Fischer, A. (2013). Histone-  
894 Methyltransferase MLL2 (KMT2B) Is Required for Memory Formation in Mice. *The*  
895 *Journal of Neuroscience* 33, 3452.
- 896 Kim, D., Pertea, G., Trapnell, C., Pimentel, H., Kelley, R., and Salzberg, S.L. (2013).  
897 TopHat2: accurate alignment of transcriptomes in the presence of insertions, deletions  
898 and gene fusions. *Genome Biol* 14, R36.



- 899 Kim, J.H., Karnovsky, A., Mahavisno, V., Weymouth, T., Pande, M., Dolinoy, D.C.,  
900 Rozek, L.S., and Sartor, M.A. (2012). LRpath analysis reveals common pathways  
901 dysregulated via DNA methylation across cancer types. *BMC Genomics* 13, 526.
- 902 Kuhn, M., Wolf, E., Maier, J.G., Mainberger, F., Feige, B., Schmid, H., Bürklin, J.,  
903 Maywald, S., Mall, V., Jung, N.H., *et al.* (2016). Sleep recalibrates homeostatic and  
904 associative synaptic plasticity in the human cortex. *Nature Communications* 7, 12455.
- 905 Lacaria, M., Gu, W., and Lupski, J.R. (2013). Circadian abnormalities in mouse models  
906 of smith-magenis syndrome: Evidence for involvement of RAI1. *American Journal of*  
907 *Medical Genetics, Part A* 161, 1561-1568.
- 908 Langmead, B., and Salzberg, S.L. (2012). Fast gapped-read alignment with Bowtie 2.  
909 *Nat Methods* 9, 357.
- 910 Lee, C., Patil, S., and Sartor, M.A. (2016). RNA-Enrich: a cut-off free functional  
911 enrichment testing method for RNA-seq with improved detection power. *Bioinformatics*  
912 32, 1100-1102.
- 913 Liao, Y., Smyth, G.K., and Shi, W. (2014). featureCounts: an efficient general purpose  
914 program for assigning sequence reads to genomic features. *Bioinformatics* 30, 923-930.
- 915 Lim, C.-S., Nam, H.J., Lee, J., Kim, D., Choi, J.E., Kang, S.J., Kim, S., Kim, H., Kwak,  
916 C., Shim, K.-W., *et al.* (2017). PKC $\alpha$ -mediated phosphorylation of LSD1 is required for  
917 presynaptic plasticity and hippocampal learning and memory. *Sci Rep* 7, 4912.
- 918 Love, M.I., Huber, W., and Anders, S. (2014). Moderated estimation of fold change and  
919 dispersion for RNA-seq data with DESeq2. *Genome Biol* 15, 550.
- 920 Mao, W., Salzberg, A.C., Uchigashima, M., Hasegawa, Y., Hock, H., Watanabe, M.,  
921 Akbarian, S., Kawasaki, Y.I., and Futai, K. (2018). Activity-Induced Regulation of  
922 Synaptic Strength through the Chromatin Reader L3mbtl1. *Cell Reports* 23, 3209-3222.
- 923 Miller, K.D., and MacKay, D.J.C. (1994). The Role of Constraints in Hebbian Learning.  
924 *Neural Comput* 6, 100-126.
- 925 Molina, J., Carmona-Mora, P., Chrast, J., Krall, P.M., Canales, C.P., Lupski, J.R.,  
926 Raymond, A., and Walz, K. (2008). Abnormal social behaviors and altered gene  
927 expression rates in a mouse model for Potocki-Lupski syndrome. *Hum Mol Genet* 17,  
928 2486-2495.
- 929 Mullins, C., Fishell, G., and Tsien, R.W. (2016). Unifying Views of Autism Spectrum  
930 Disorders: A Consideration of Autoregulatory Feedback Loops. *Neuron* 89, 1131-1156.
- 931 Neelamegam, R., Ricq, E.L., Malvaez, M., Patnaik, D., Norton, S., Carlin, S.M., Hill, I.T.,  
932 Wood, M.A., Haggarty, S.J., and Hooker, J.M. (2012). Brain-penetrant LSD1 inhibitors  
933 can block memory consolidation. *ACS Chem Neurosci* 3, 120-128.

- 934 Oike, Y., Hata, A., Mamiya, T., Kaname, T., Noda, Y., Suzuki, M., Yasue, H.,  
935 Nabeshima, T., Araki, K., and Yamamura, K.-i. (1999). Truncated CBP Protein Leads to  
936 Classical Rubinstein—Taybi Syndrome Phenotypes in Mice: Implications for a  
937 Dominant-Negative Mechanism. *Hum Mol Genet* 8, 387-396.
- 938 Okuno, H. (2011). Regulation and function of immediate-early genes in the brain:  
939 Beyond neuronal activity markers. *Neurosci Res* 69, 175-186.
- 940 Oliveira, A.M.M. (2016). DNA methylation: a permissive mark in memory formation and  
941 maintenance. *Learn Memory* 23, 587-593.
- 942 Paulsen, M.T., Veloso, A., Prasad, J., Bedi, K., Ljungman, E.A., Magnuson, B., Wilson,  
943 T.E., and Ljungman, M. (2014). Use of Bru-Seq and BruChase-Seq for genome-wide  
944 assessment of the synthesis and stability of RNA. *Methods (San Diego, Calif)* 67, 45-54.
- 945 Paulsen, M.T., Veloso, A., Prasad, J., Bedi, K., Ljungman, E.A., Tsan, Y.-C., Chang, C.-  
946 W., Tarrier, B., Washburn, J.G., Lyons, R., *et al.* (2013). Coordinated regulation of  
947 synthesis and stability of RNA during the acute TNF-induced proinflammatory response.  
948 *Proceedings of the National Academy of Sciences* 110, 2240-2245.
- 949 Potocki, L., Bi, W., Treadwell-Deering, D., Carvalho, C.M., Eifert, A., Friedman, E.M.,  
950 Glaze, D., Krull, K., Lee, J.A., Lewis, R.A., *et al.* (2007). Characterization of Potocki-  
951 Lupski syndrome (dup(17)(p11.2p11.2)) and delineation of a dosage-sensitive critical  
952 interval that can convey an autism phenotype. *Am J Hum Genet* 80, 633-649.
- 953 Potocki, L., Glaze, D., Tan, D., Park, S., Kashork, C., Shaffer, L., Reiter, R., and Lupski,  
954 J. (2000). Circadian rhythm abnormalities of melatonin in Smith-Magenis syndrome. *J*  
955 *Med Genet* 37, 428-433.
- 956 Risher, W.C., and Eroglu, C. (2012). Thrombospondins as key regulators of  
957 synaptogenesis in the central nervous system. *Matrix Biol* 31, 170-177.
- 958 Rudenko, A., Dawlaty, M.M., Seo, J., Cheng, A.W., Meng, J., Le, T., Faull, K.F.,  
959 Jaenisch, R., and Tsai, L.H. (2013). Tet1 is critical for neuronal activity-regulated gene  
960 expression and memory extinction. *Neuron* 79, 1109-1122.
- 961 Schanzenbächer, Christoph T., Sambandan, S., Langer, Julian D., and Schuman,  
962 Erin M. (2016). Nascent Proteome Remodeling following Homeostatic Scaling at  
963 Hippocampal Synapses. *Neuron* 92, 358-371.
- 964 Schaukowitch, K., Reese, A.L., Kim, S.K., Kilaru, G., Joo, J.Y., Kavalali, E.T., and Kim,  
965 T.K. (2017). An Intrinsic Transcriptional Program Underlying Synaptic Scaling during  
966 Activity Suppression. *Cell Rep* 18, 1512-1526.
- 967 Slager, R.E., Newton, T.L., Vlangos, C.N., Finucane, B., and Elsea, S.H. (2003).  
968 Mutations in RAI1 associated with Smith–Magenis syndrome. *Nat Genet* 33, 466.

- 969 Soden, M.E., and Chen, L. (2010). Fragile X protein FMRP is required for homeostatic  
970 plasticity and regulation of synaptic strength by retinoic acid. *J Neurosci* *30*, 16910-  
971 16921.
- 972 Supek, F., Bošnjak, M., Škunca, N., and Šmuc, T. (2011). REVIGO Summarizes and  
973 Visualizes Long Lists of Gene Ontology Terms. *PLoS One* *6*, e21800.
- 974 Tachibana, M., Ueda, J., Fukuda, M., Takeda, N., Ohta, T., Iwanari, H., Sakihama, T.,  
975 Kodama, T., Hamakubo, T., and Shinkai, Y. (2005). Histone methyltransferases G9a  
976 and GLP form heteromeric complexes and are both crucial for methylation of  
977 euchromatin at H3-K9. *Genes Dev* *19*, 815-826.
- 978 Tasic, B., Menon, V., Nguyen, T.N., Kim, T.K., Jarsky, T., Yao, Z., Levi, B., Gray, L.T.,  
979 Sorensen, S.A., Dolbeare, T., *et al.* (2016). Adult mouse cortical cell taxonomy revealed  
980 by single cell transcriptomics. *Nat Neurosci* *19*, 335.
- 981 Turrigiano, G.G. (2008). The self-tuning neuron: synaptic scaling of excitatory synapses.  
982 *Cell* *135*, 422-435.
- 983 Turrigiano, G.G. (2017). The dialectic of Hebb and homeostasis. *Philosophical*  
984 *Transactions of the Royal Society B: Biological Sciences* *372*.
- 985 Vallianatos, C.N., Farrehi, C., Friez, M.J., Burmeister, M., Keegan, C.E., and Iwase, S.  
986 (2018). Altered Gene-Regulatory Function of KDM5C by a Novel Mutation Associated  
987 With Autism and Intellectual Disability. *Front Mol Neurosci* *11*.
- 988 Vogel-Ciernia, A., Matheos, D.P., Barrett, R.M., Kramar, E.A., Azzawi, S., Chen, Y.,  
989 Magnan, C.N., Zeller, M., Sylvain, A., Haettig, J., *et al.* (2013). The neuron-specific  
990 chromatin regulatory subunit BAF53b is necessary for synaptic plasticity and memory.  
991 *Nat Neurosci* *16*, 552-561.
- 992 Wang, J., Telese, F., Tan, Y., Li, W., Jin, C., He, X., Basnet, H., Ma, Q., Merkurjev, D.,  
993 Zhu, X., *et al.* (2015). LSD1n is an H4K20 demethylase regulating memory formation via  
994 transcriptional elongation control. *Nat Neurosci* *18*, 1256-1264.
- 995 West, A.E., Griffith, E.C., and Greenberg, M.E. (2002). Regulation of transcription  
996 factors by neuronal activity. *Nat Rev Neurosci* *3*, 921-931.
- 997 Widagdo, J., and Anggono, V. (2018). The m6A-epitranscriptomic signature in  
998 neurobiology: from neurodevelopment to brain plasticity. *J Neurochem* *0*.
- 999 Williams, S.R., Zies, D., Mullegama, S.V., Grotewiel, M.S., and Elsea, S.H. (2012).  
1000 Smith-magenis syndrome results in disruption of CLOCK gene transcription and reveals  
1001 an integral role for RAI1 in the maintenance of circadian rhythmicity. *Am J Hum Genet*  
1002 *90*, 941-949.

- 1003 Yee, A.X., Hsu, Y.-T., and Chen, L. (2017). A metaplasticity view of the interaction  
1004 between homeostatic and Hebbian plasticity. *Philosophical Transactions of the Royal*  
1005 *Society B: Biological Sciences* 372.
- 1006 Yu, H., Su, Y., Shin, J., Zhong, C., Guo, J.U., Weng, Y.-I., Gao, F., Geschwind, D.H.,  
1007 Coppola, G., Ming, G.-I., *et al.* (2015). Tet3 regulates synaptic transmission and  
1008 homeostatic plasticity via DNA oxidation and repair. *18*, 7-9.
- 1009 Zajackowski, E.L., Zhao, Q.-Y., Zhang, Z.H., Li, X., Wei, W., Marshall, P.R., Leighton,  
1010 L.J., Nainar, S., Feng, C., Spitale, R.C., *et al.* (2018). Bioorthogonal Metabolic Labeling  
1011 of Nascent RNA in Neurons Improves the Sensitivity of Transcriptome-Wide Profiling.  
1012 *ACS Chem Neurosci* 9, 1858-1865.
- 1013 Zhang, Y., Chen, K., Sloan, S.A., Bennett, M.L., Scholze, A.R., O'Keefe, S., Phatnani,  
1014 H.P., Guarnieri, P., Caneda, C., Ruderisch, N., *et al.* (2014). An RNA-sequencing  
1015 transcriptome and splicing database of glia, neurons, and vascular cells of the cerebral  
1016 cortex. *J Neurosci* 34, 11929-11947.
- 1017 Zhang, Y., Liu, T., Meyer, C.A., Eeckhoute, J., Johnson, D.S., Bernstein, B.E.,  
1018 Nusbaum, C., Myers, R.M., Brown, M., Li, W., *et al.* (2008). Model-based analysis of  
1019 ChIP-Seq (MACS). *Genome Biol* 9, R137.
- 1020 Zhong, X., Li, H., and Chang, Q. (2012). MeCP2 phosphorylation is required for  
1021 modulating synaptic scaling through mGluR5. *J Neurosci* 32, 12841-12847.
- 1022

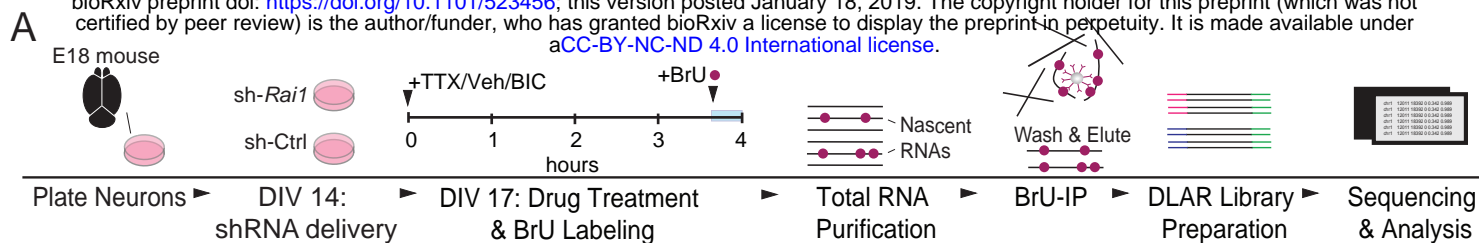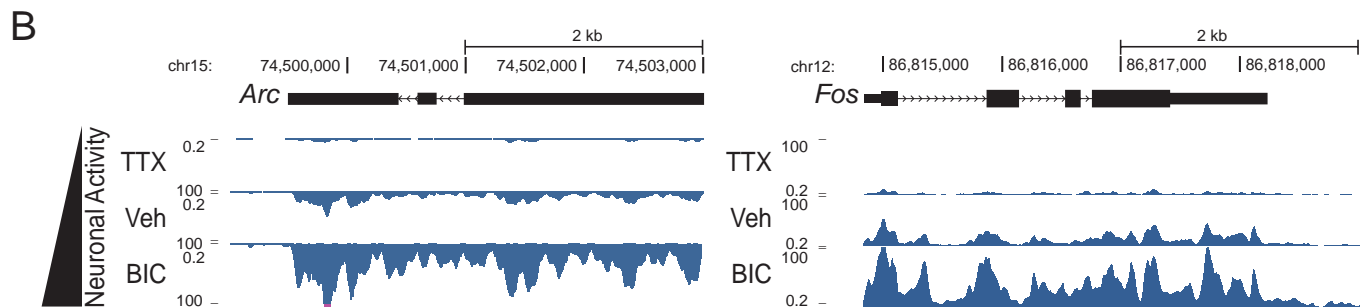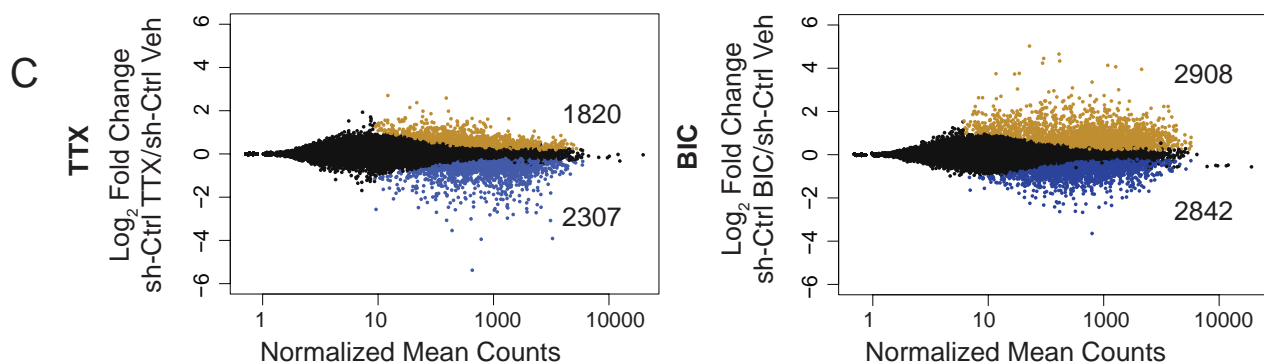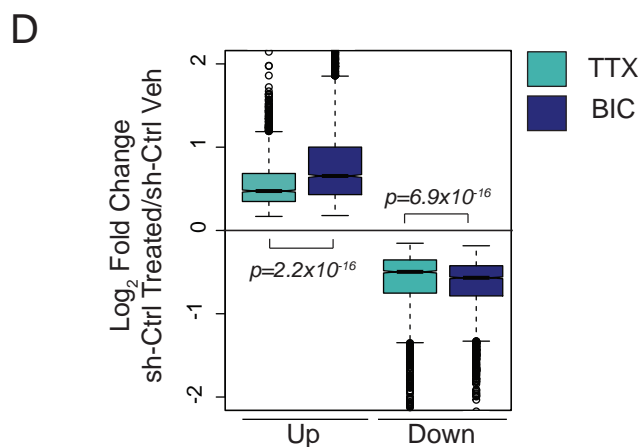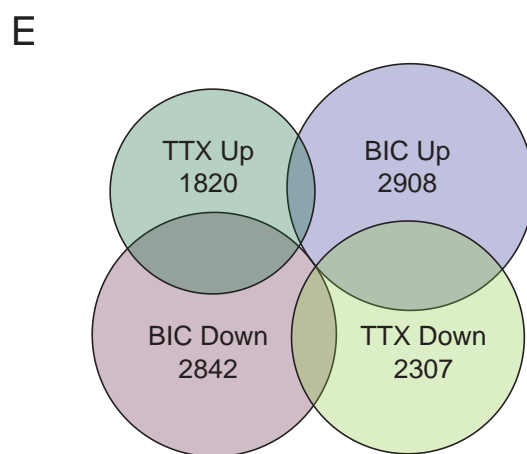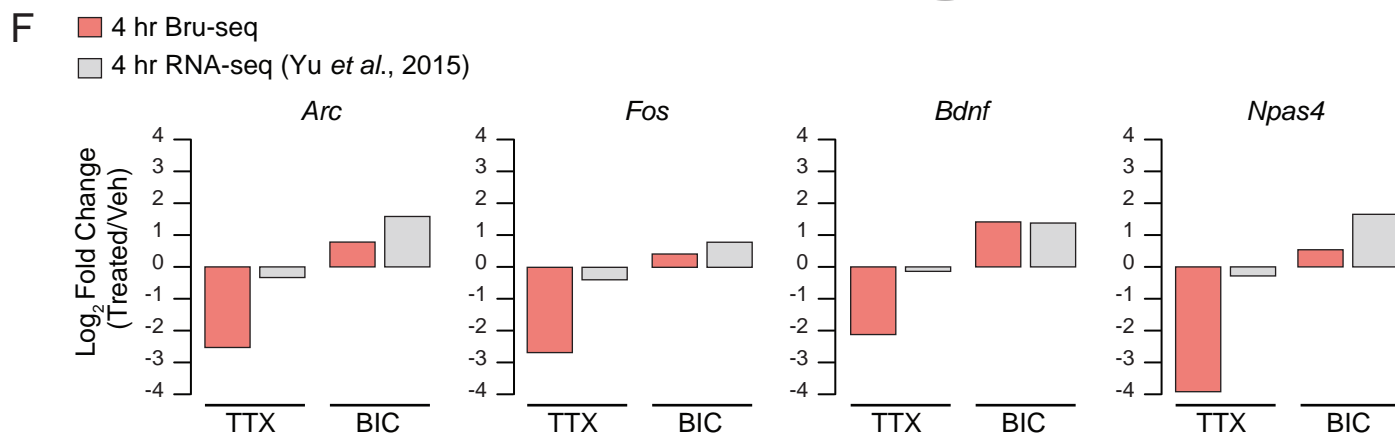

Figure 1

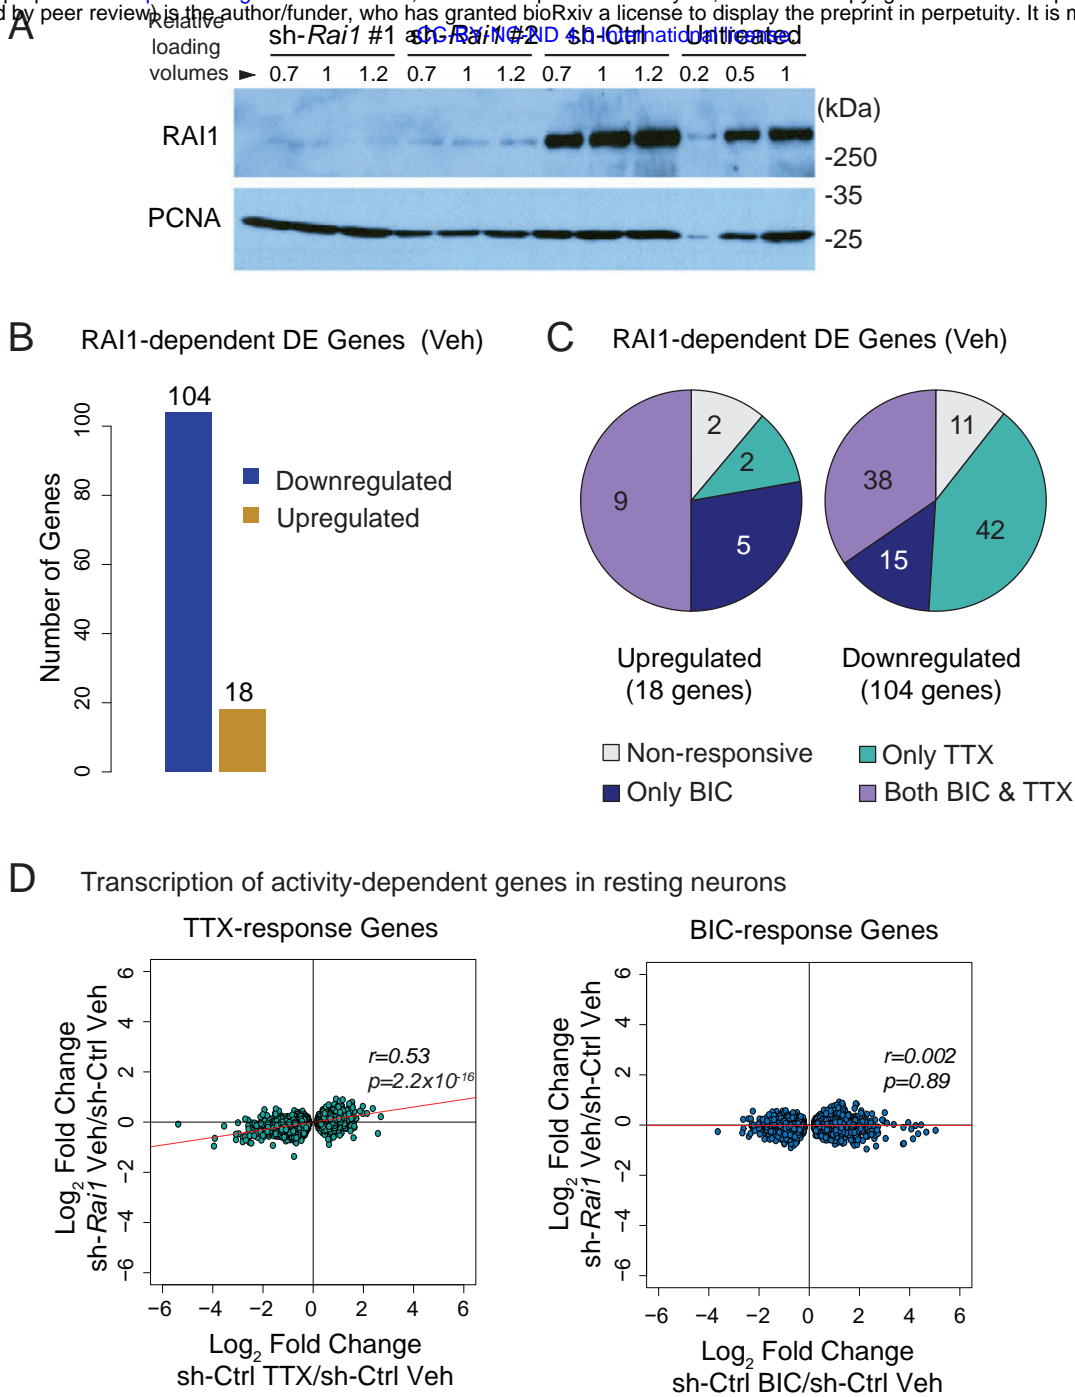

Figure 2

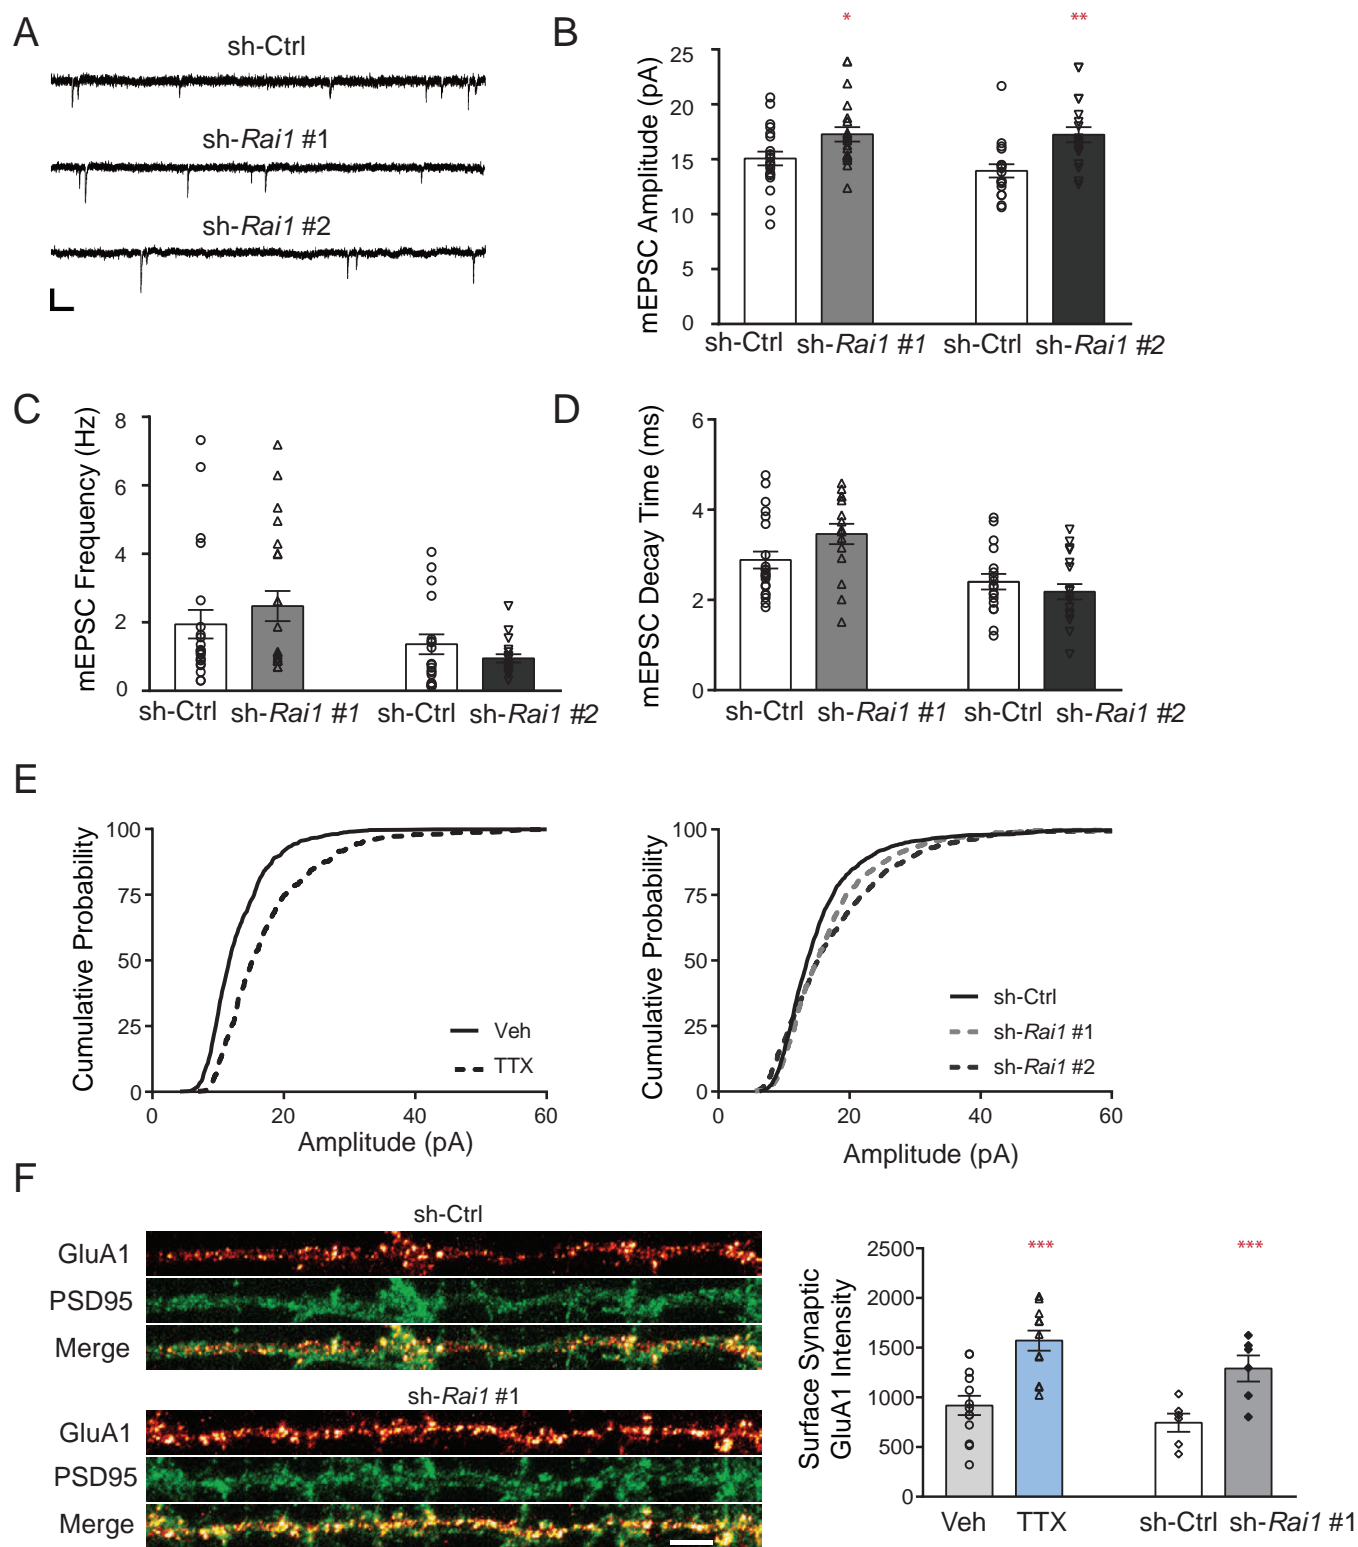

Figure 3

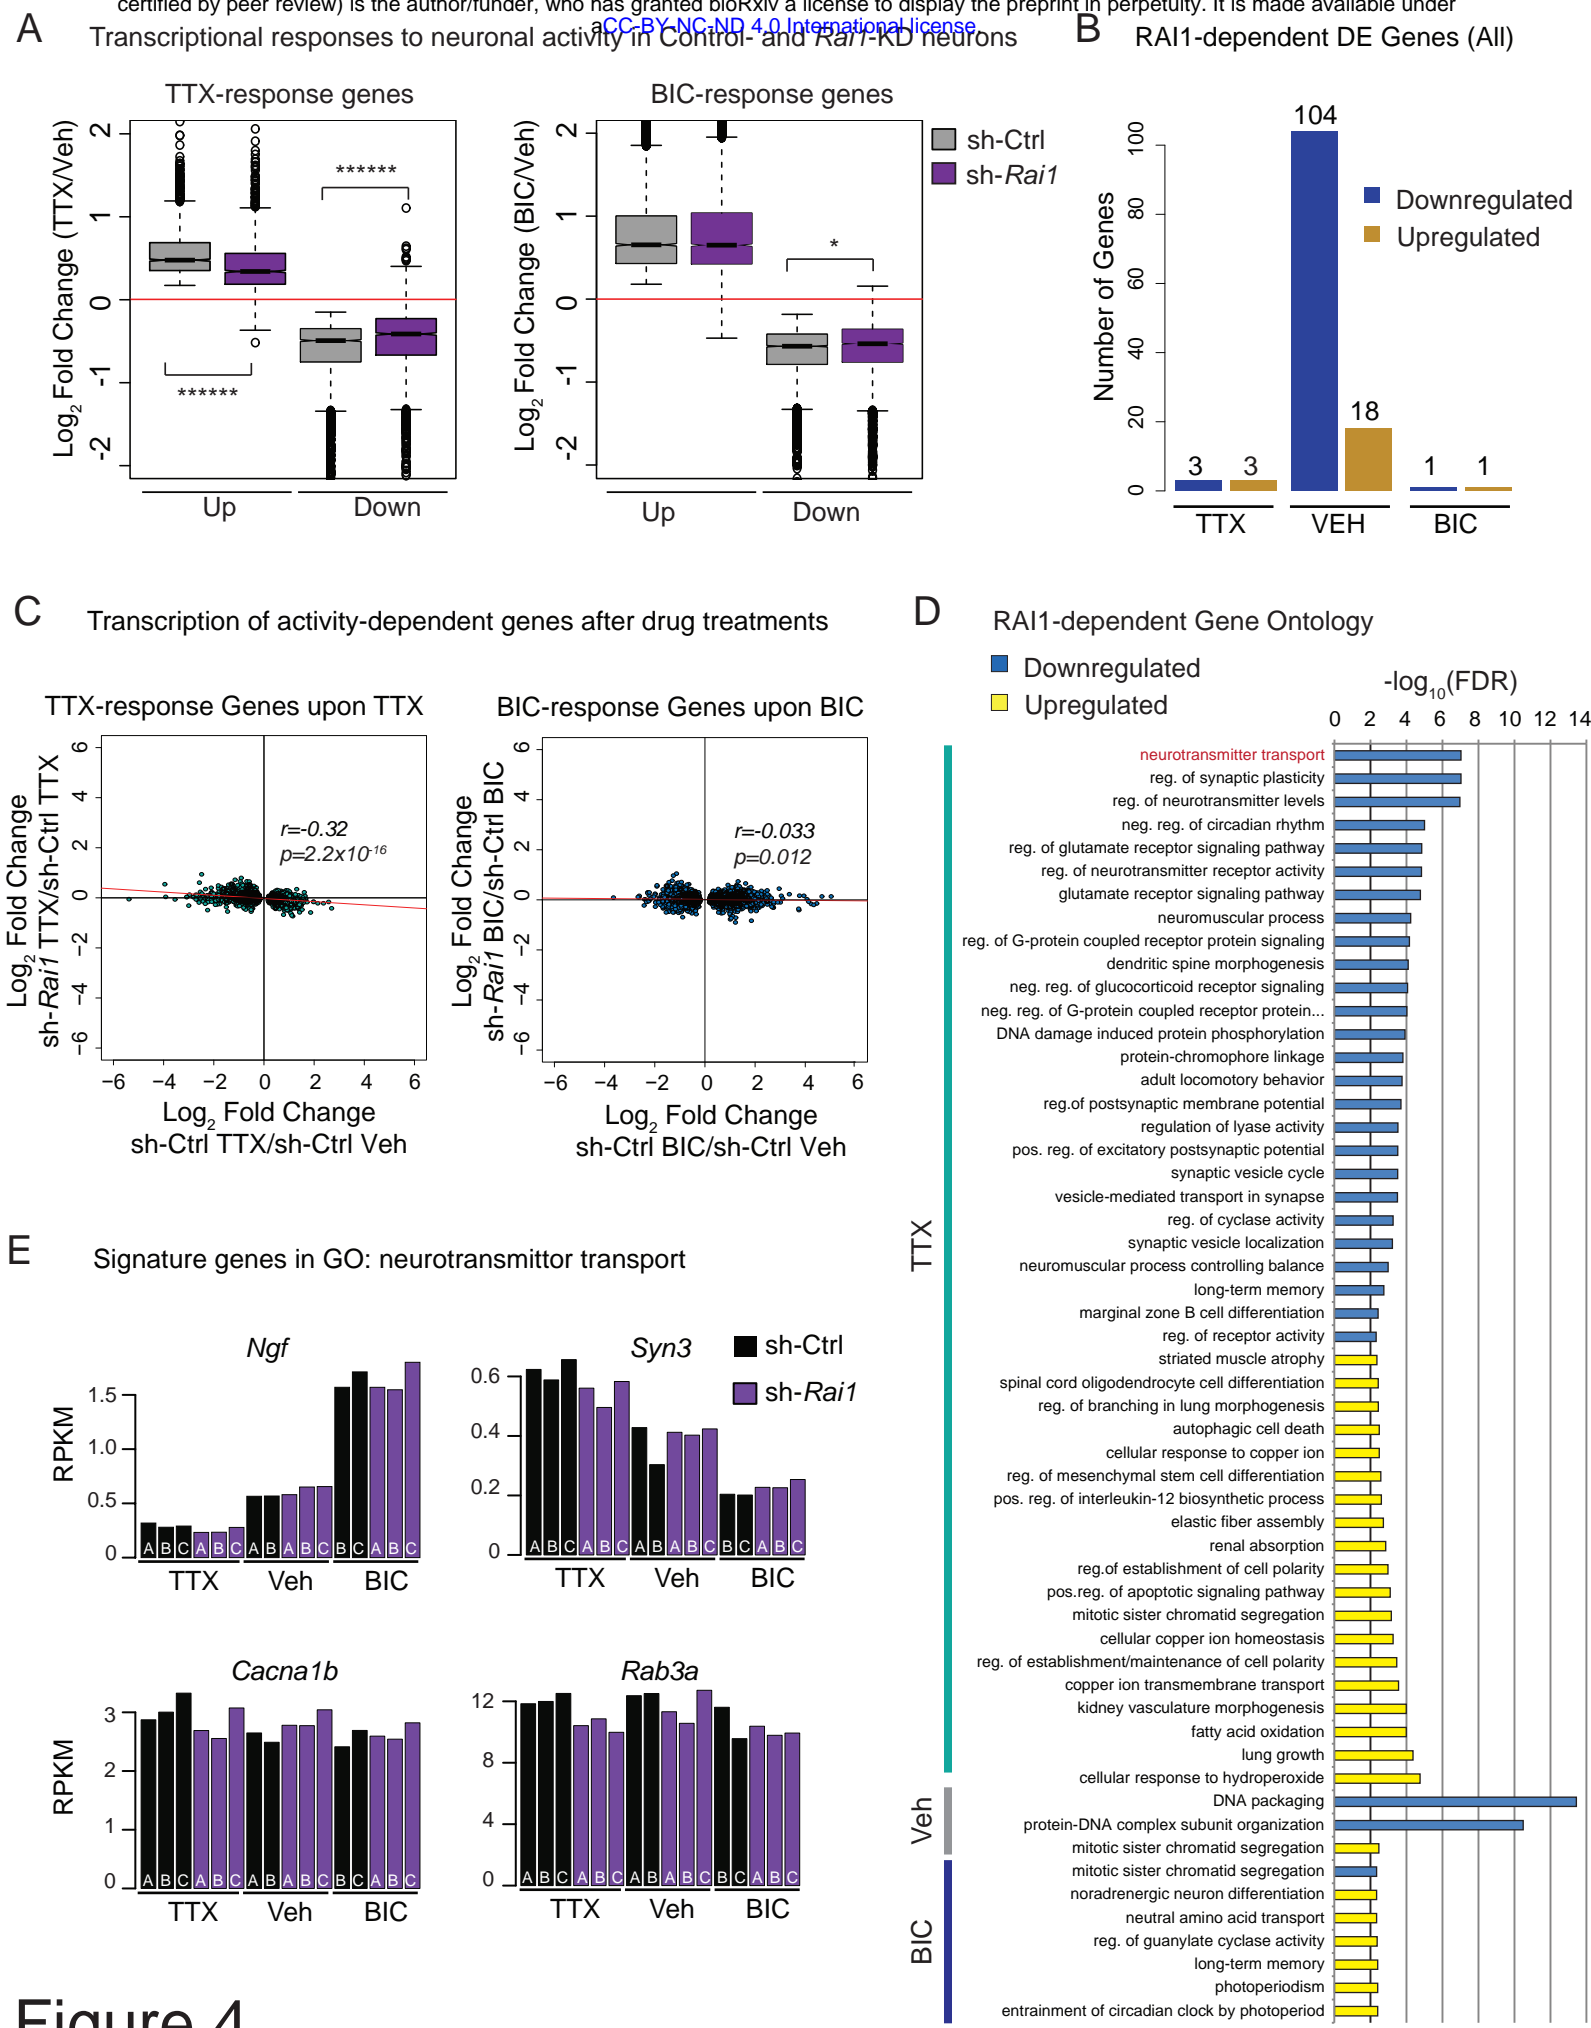

Figure 4



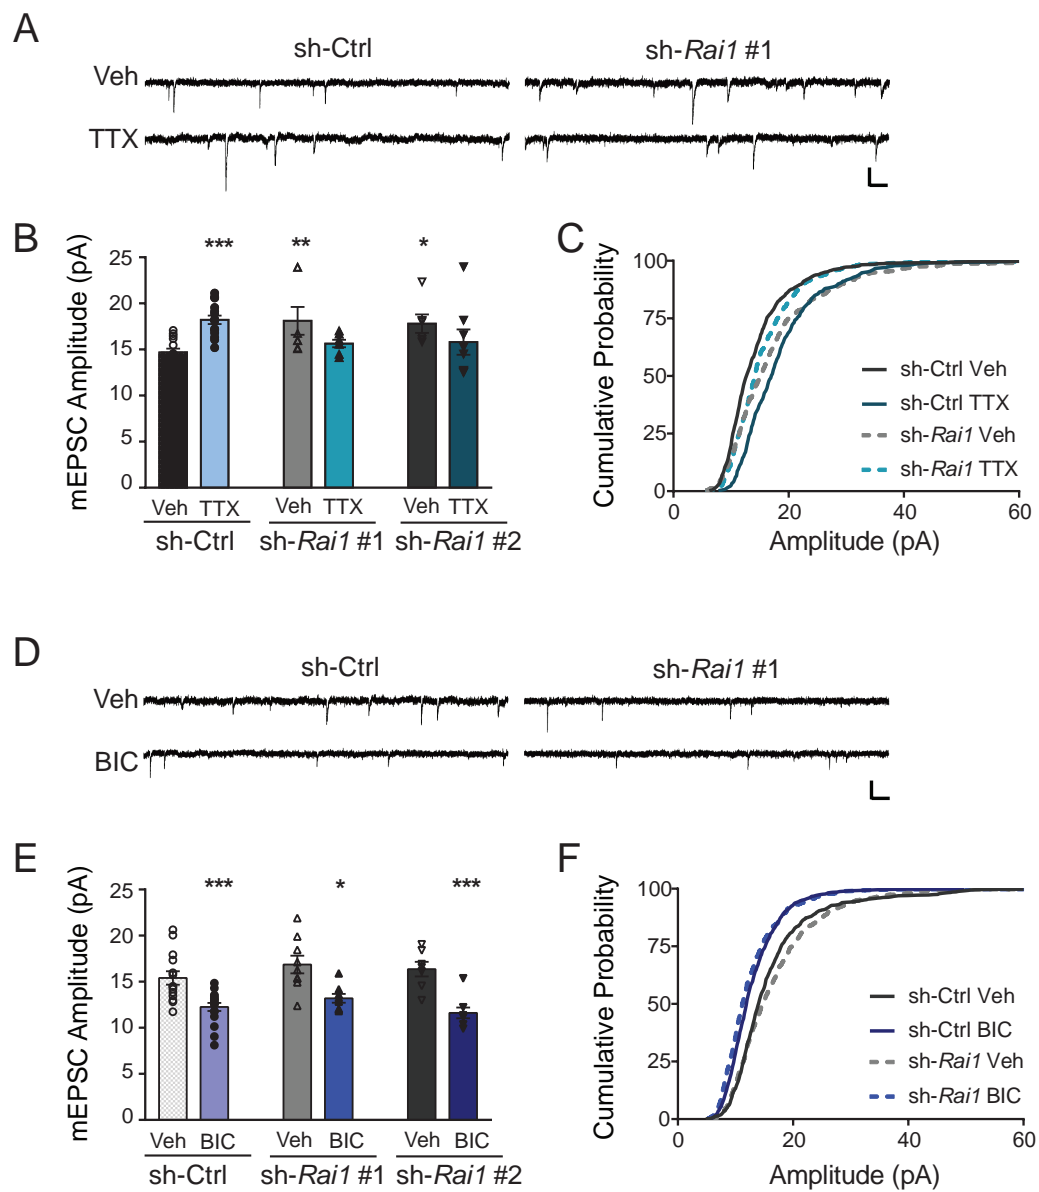

Figure 5

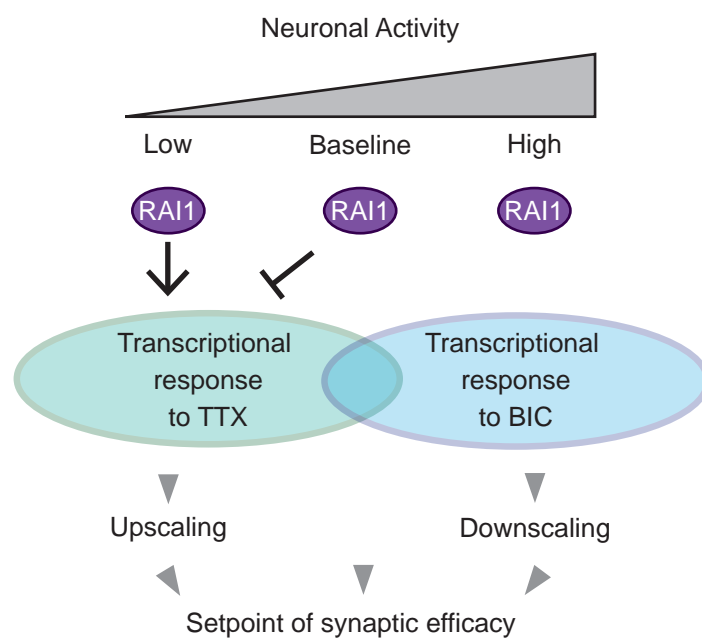

Figure 6

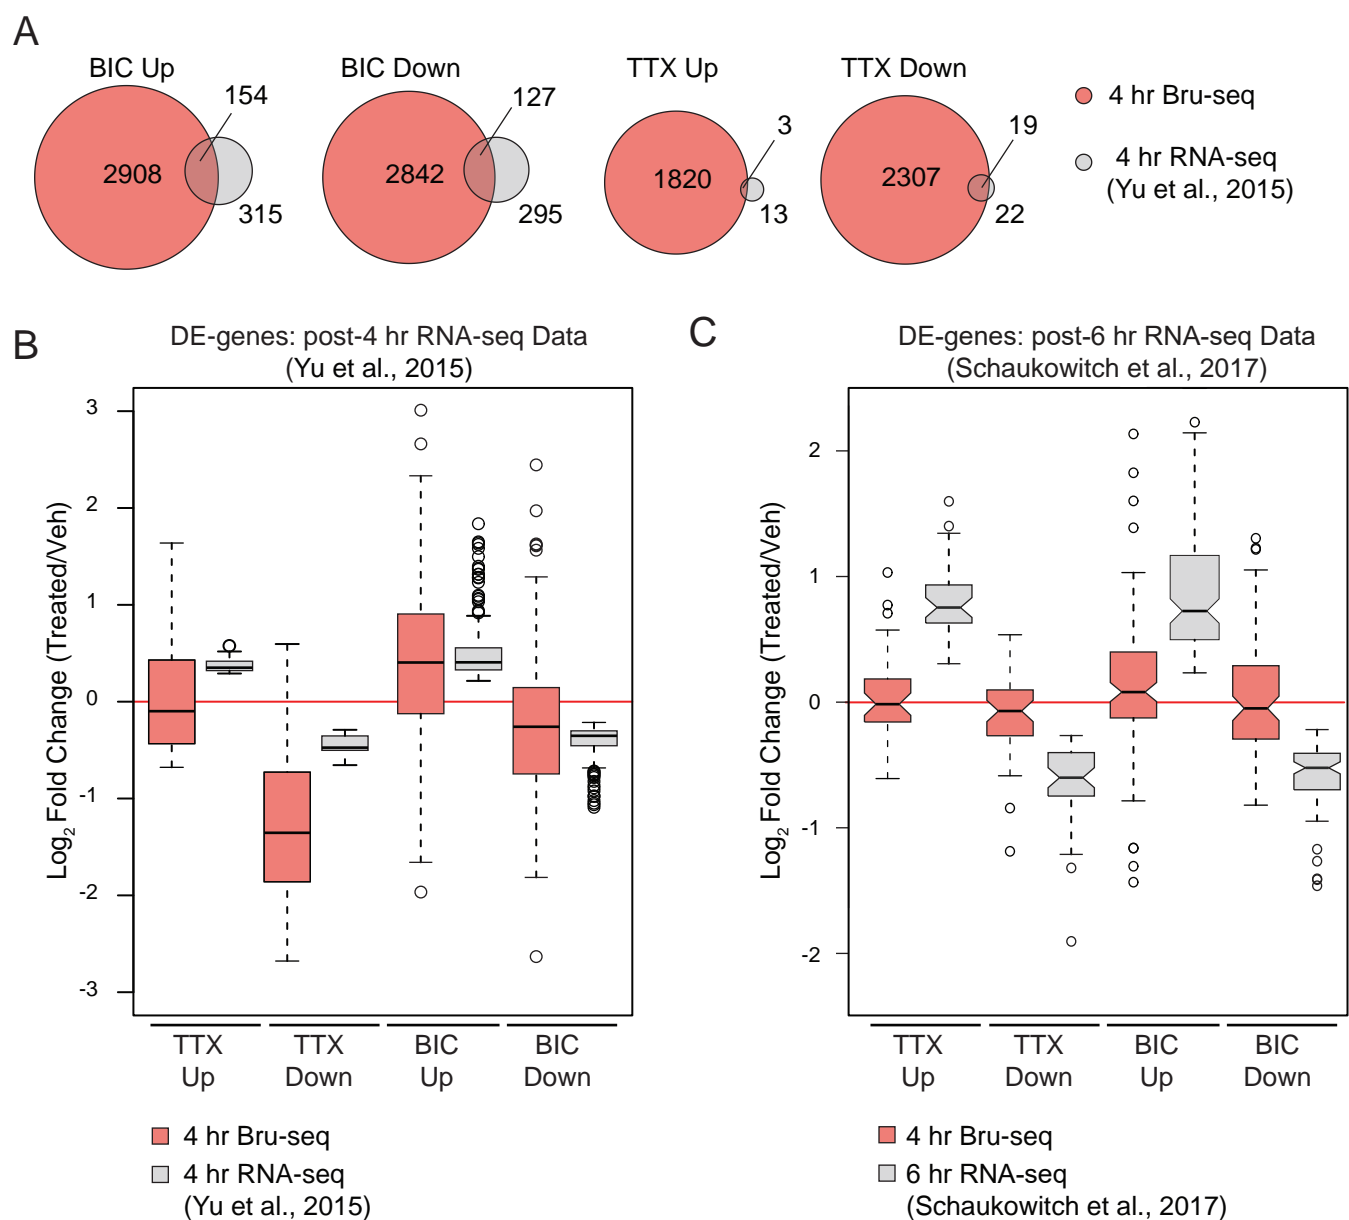

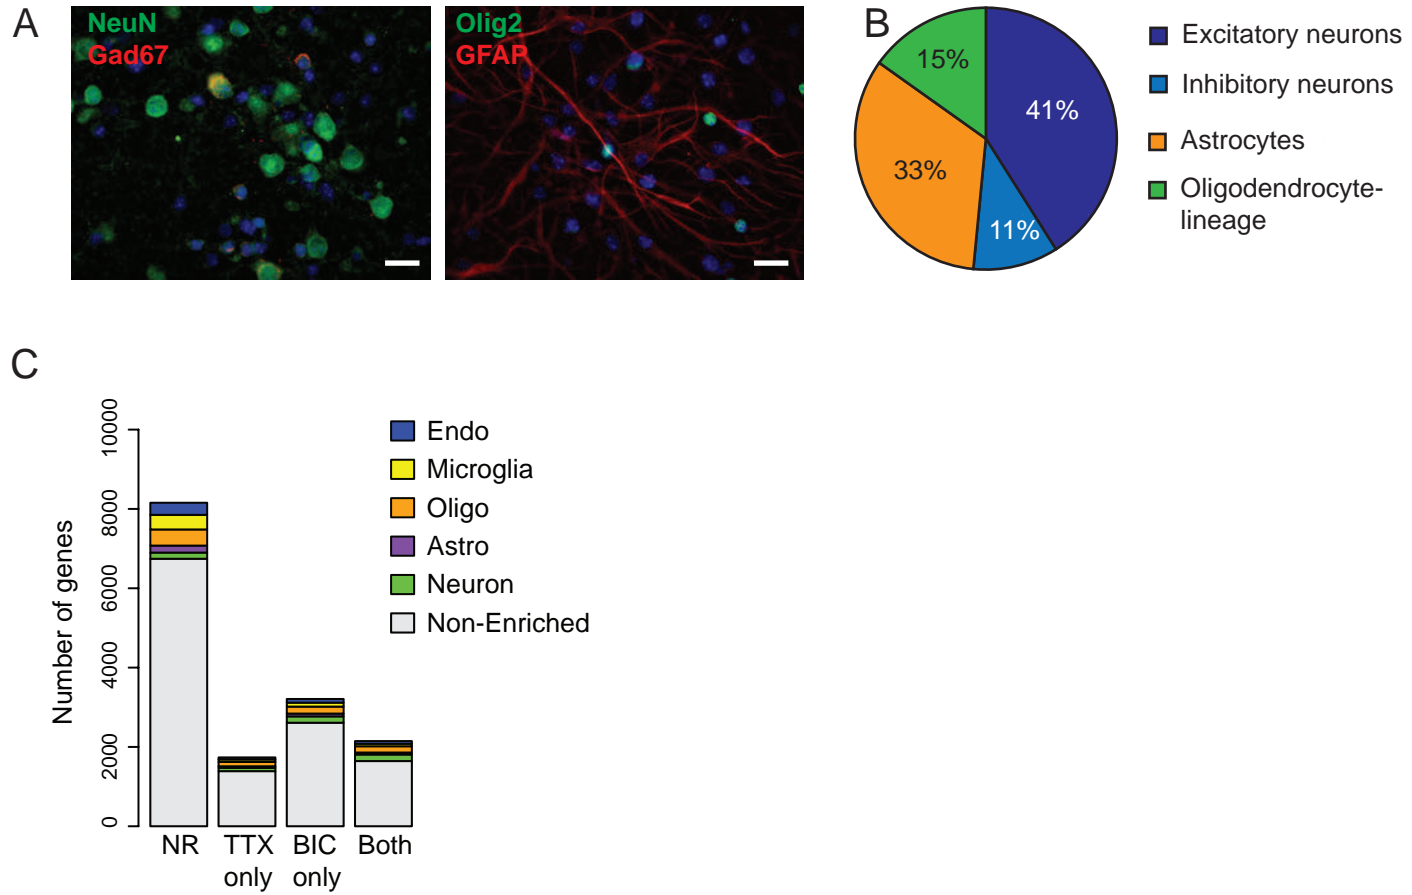

Supplemental Figure 2

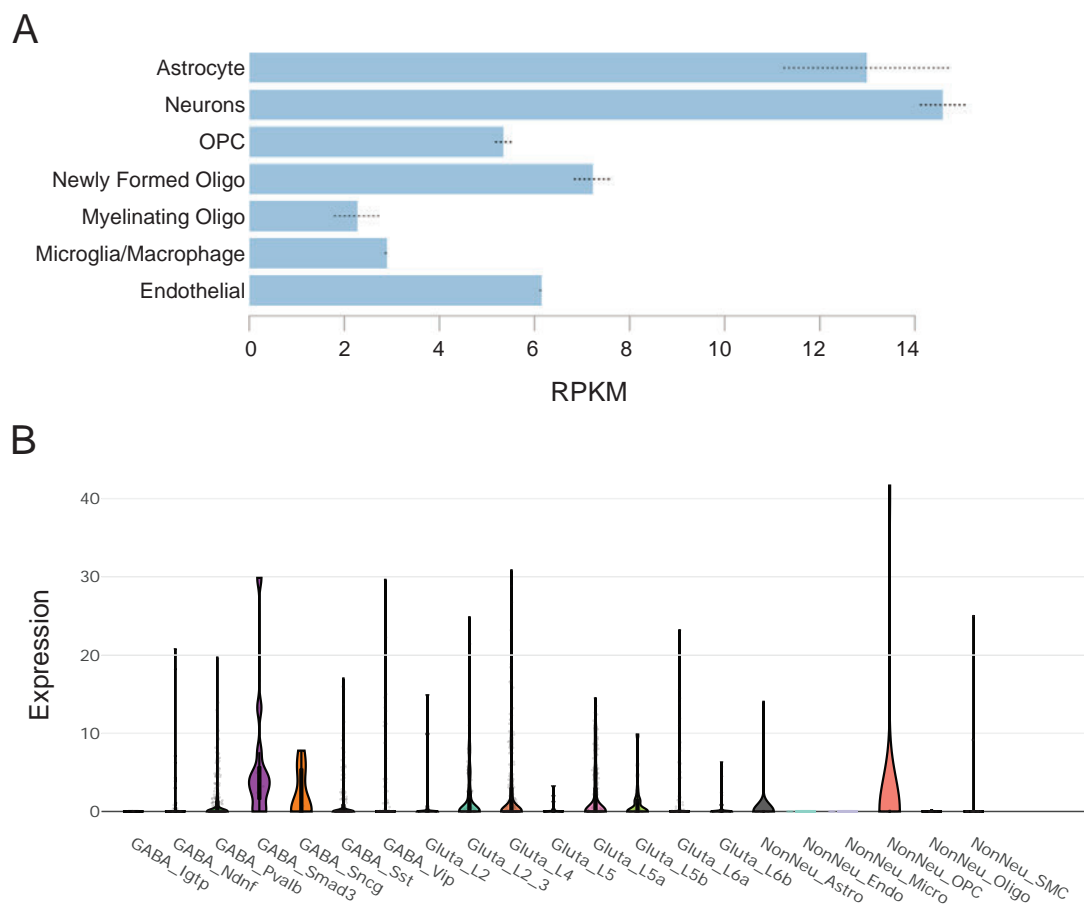

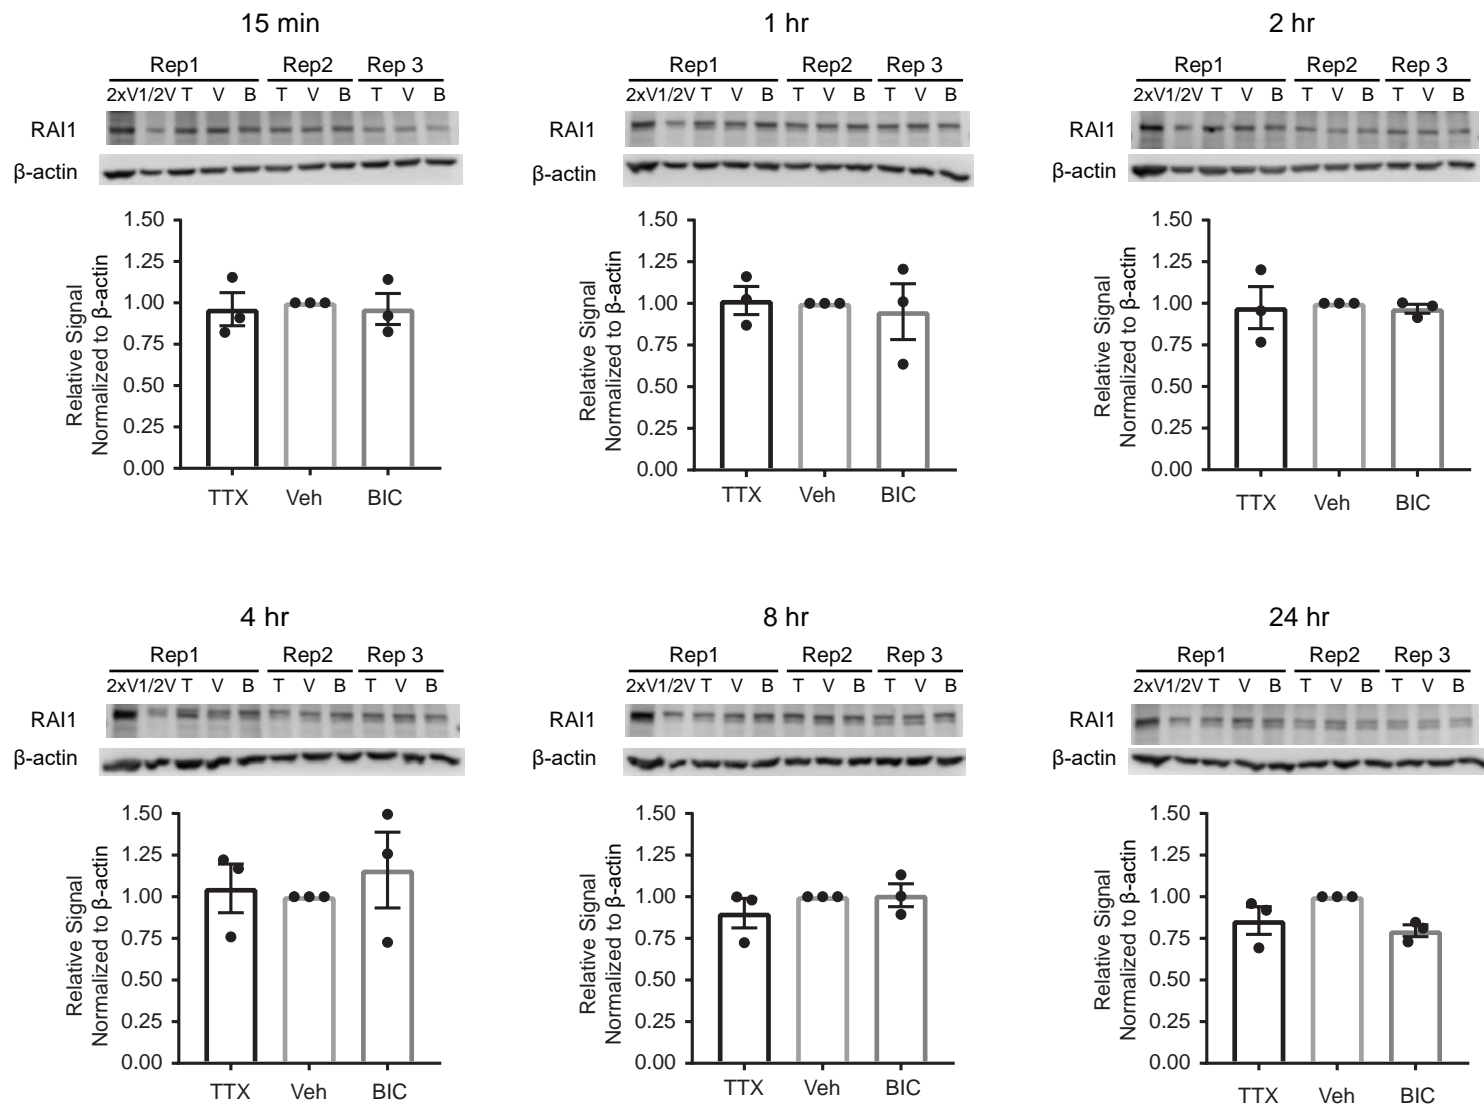

Supplemental Figure 4

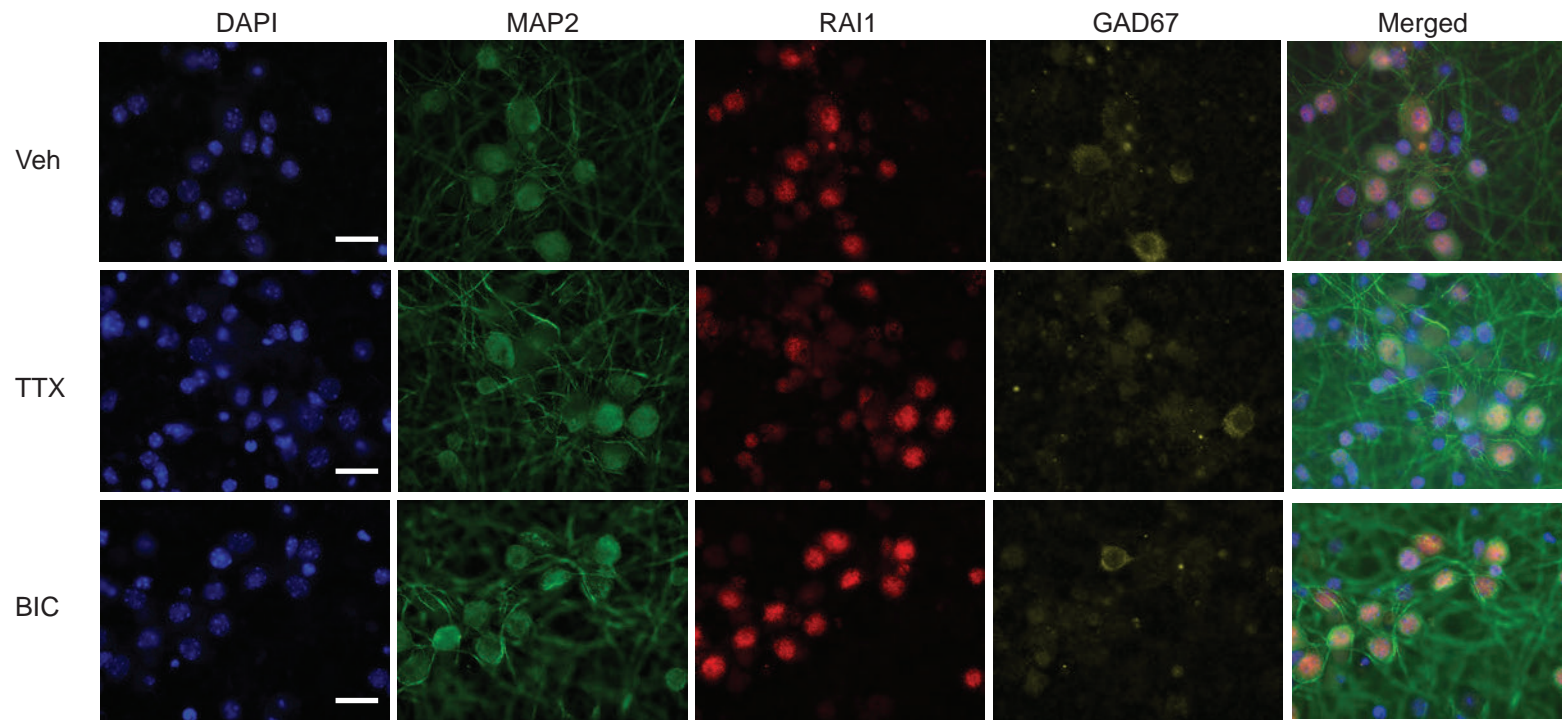

Supplemental Figure 5

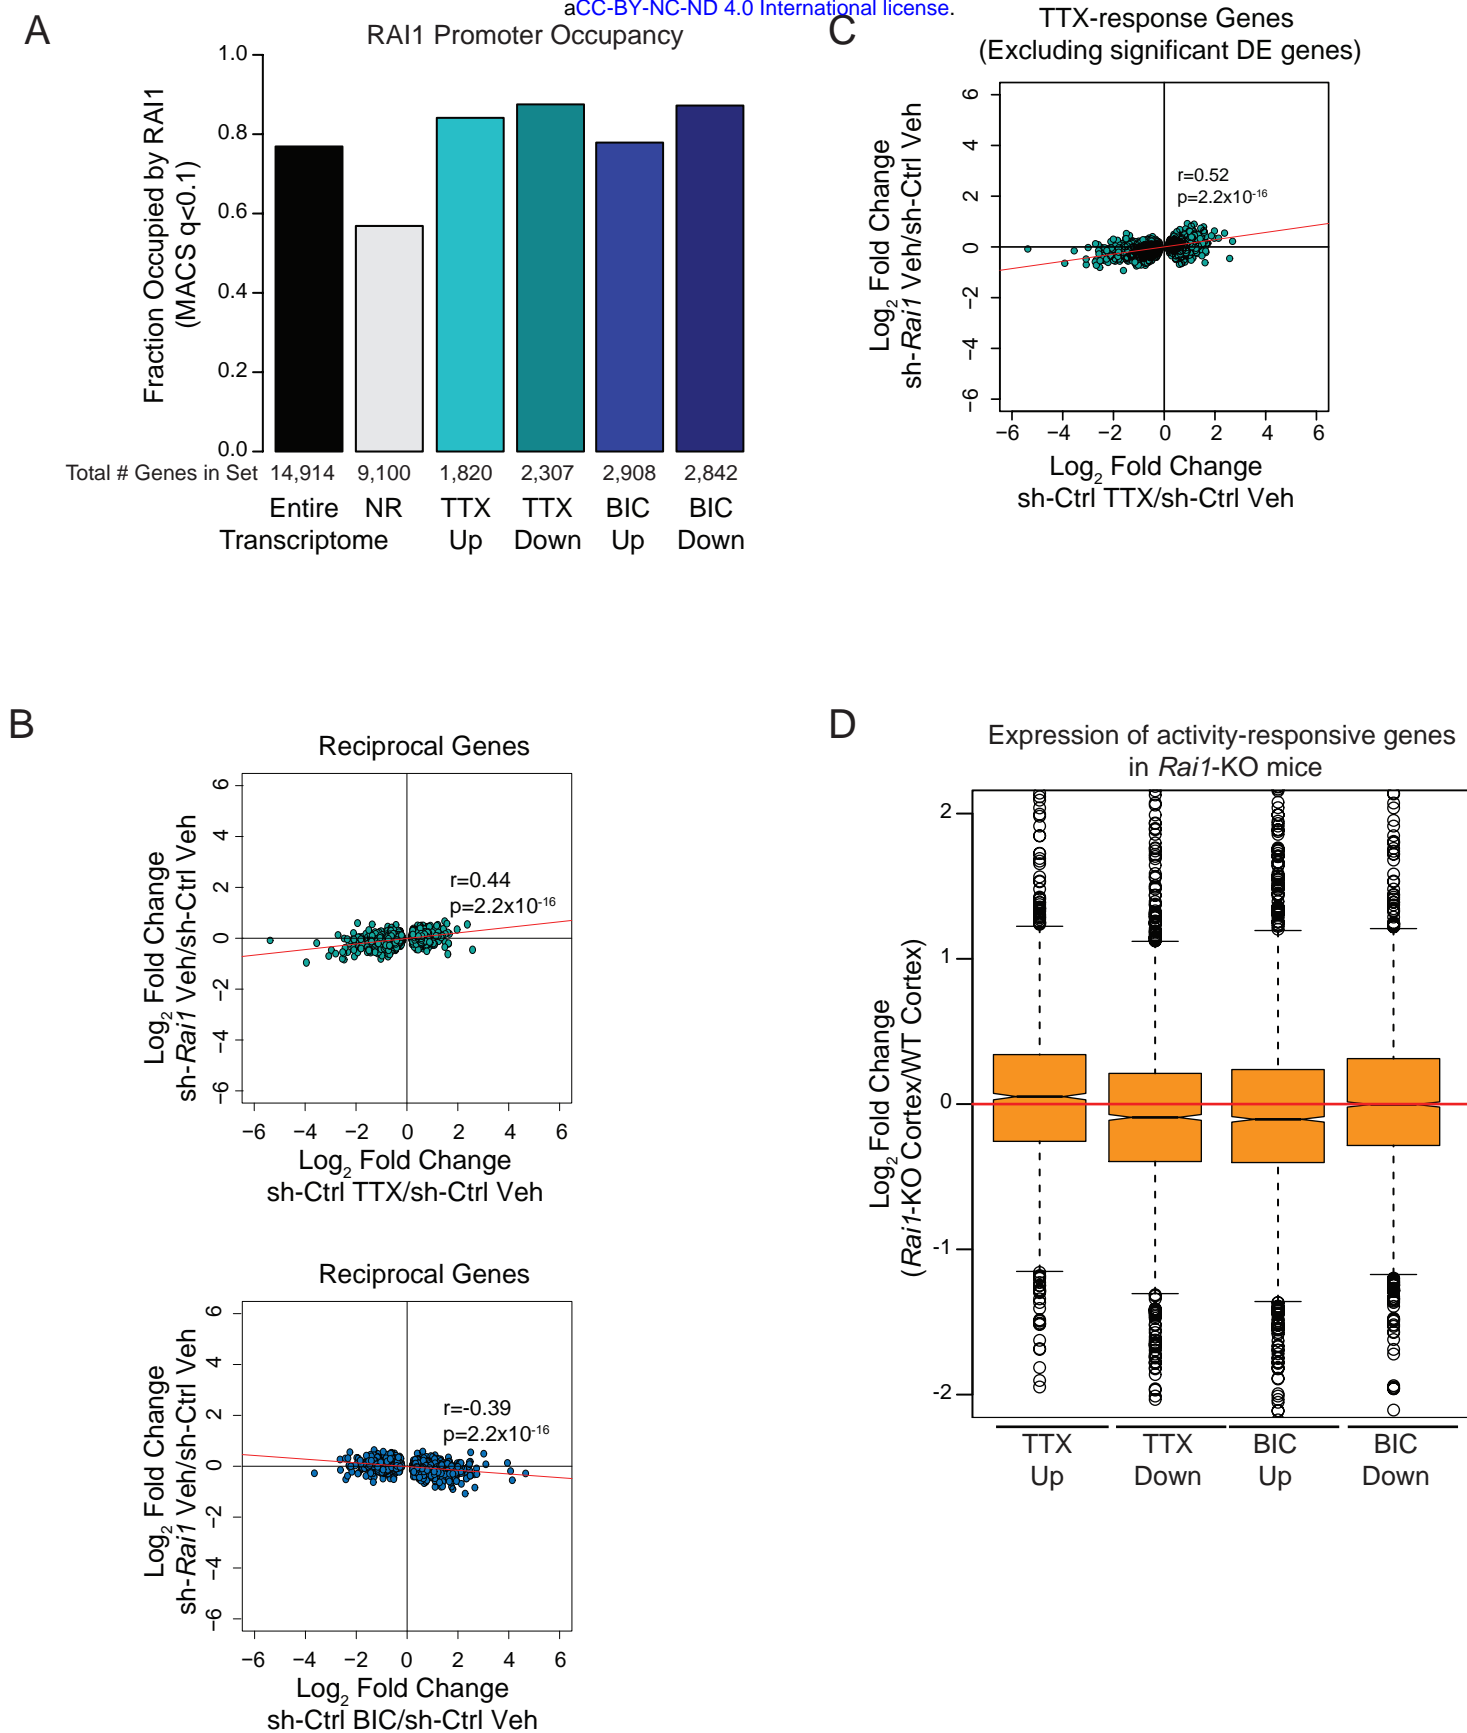



**A** Transcription of activity-dependent genes after drug treatments

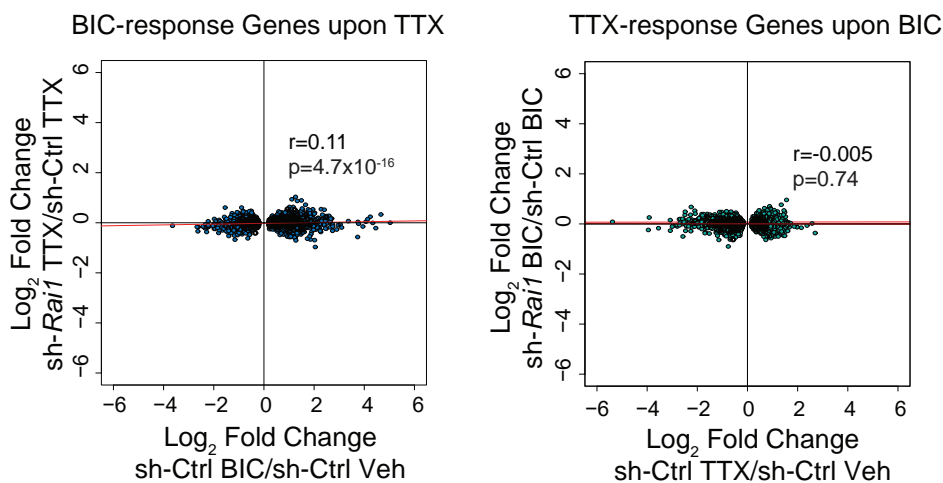

**B**

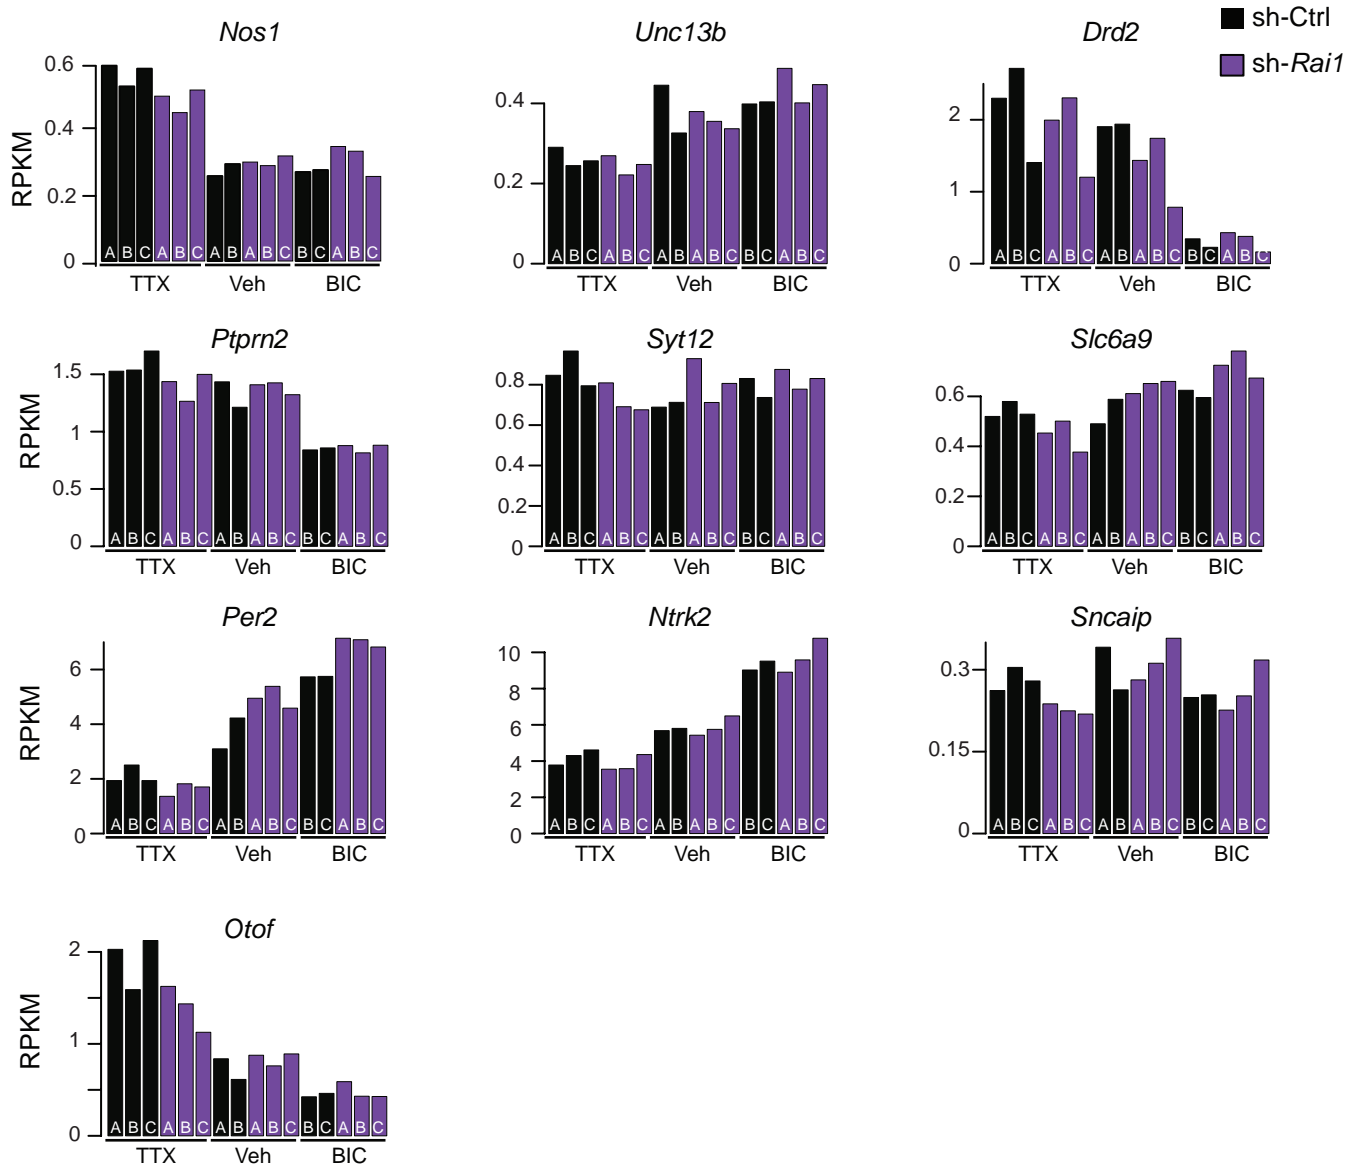

Source: http://biorxiv.org/content/10.1101/523456v1.full.pdf
